# Supplementary material
Source: PubMed Central journal article supplement (PMC4361283)

**Dataset S1.** Enzyme active site superpositions. Active site superpositions for all mycobacterial enzyme pairs in the same OrthoMCL family, in order of decreasing active site similarity ( $PS_{APF}$ ).

1. Mtb metK (PDB:3TDE, white), *M. marinum* metK (3RV2, red/pink)  
Sequence identity 95%,  $PS_{APF}$  99%

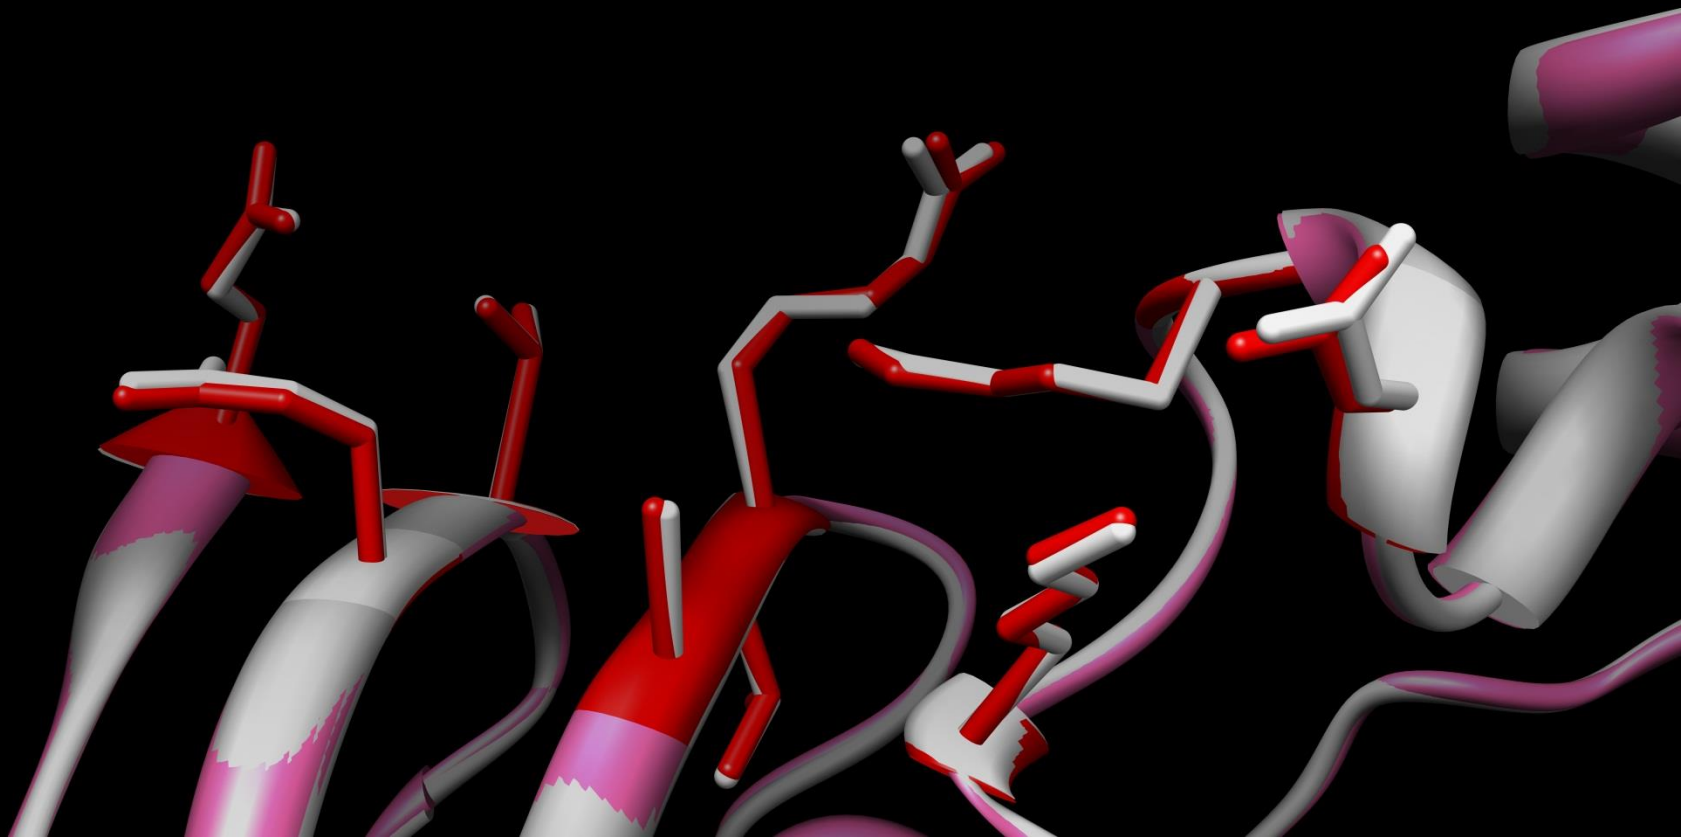

2. Mtb gpmA (PDB:1RII, white), *M. leprae* gpmA (4EO9, red/pink)  
Sequence identity 89%,  $PS_{APF}$  99%

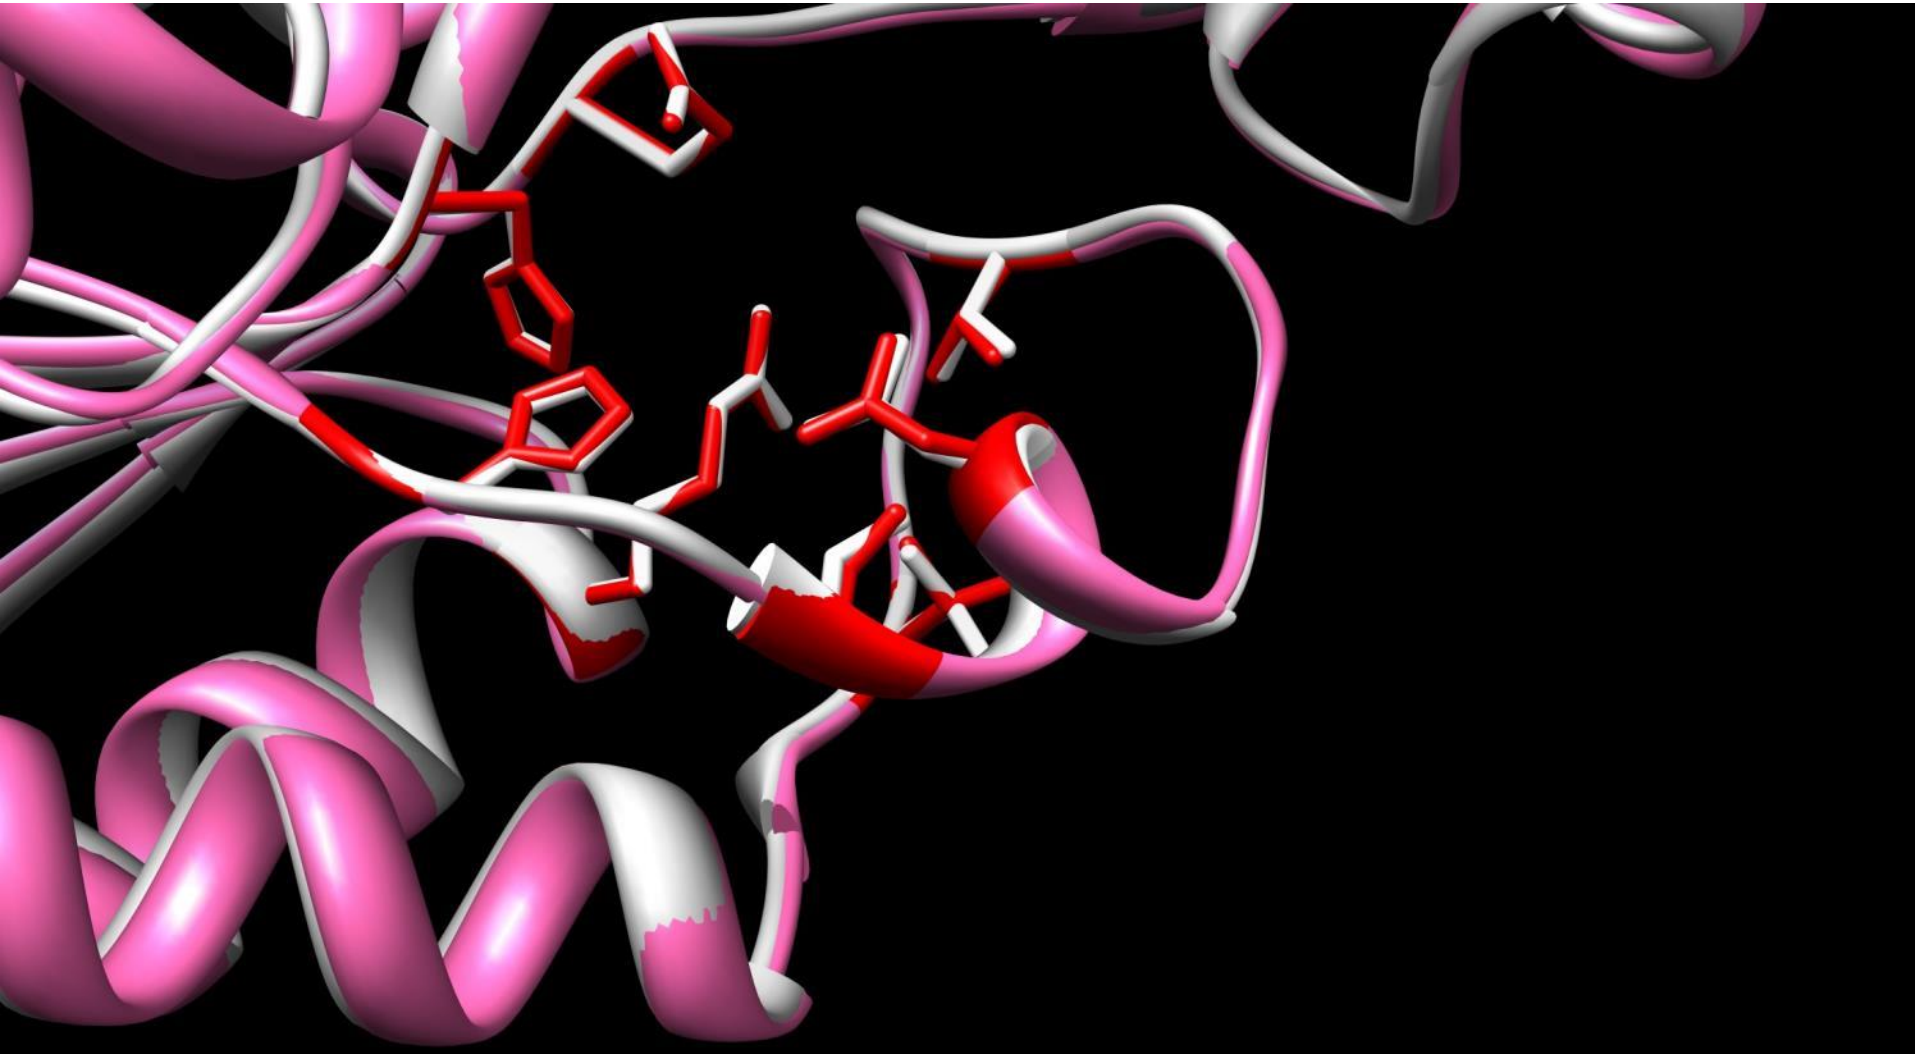

3. Mtb bfr (PDB:2WTL, white), *M. smegmatis* bfr (3BKN, red/pink)  
Sequence identity 88%,  $PS_{APF}$  97%

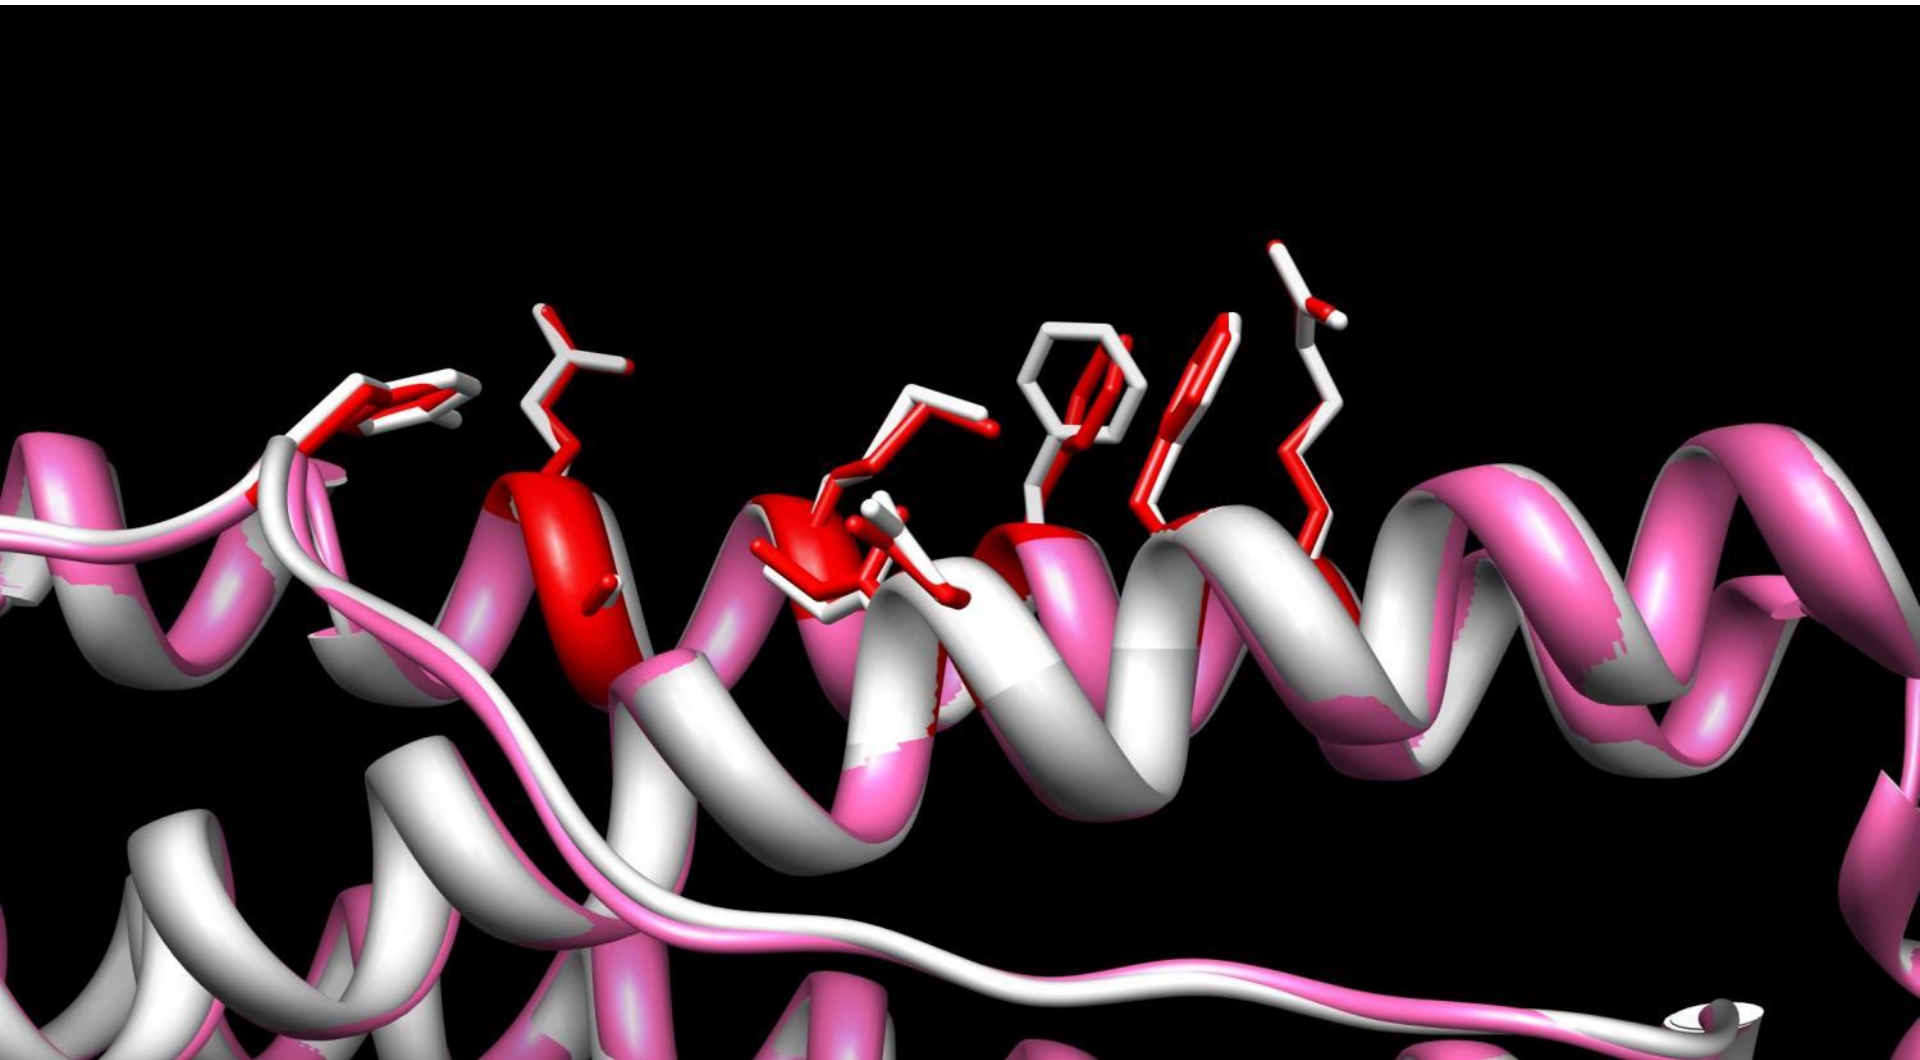

4. Mtb metK (PDB:3TDE, white), *M. avium* metK (3S82, red/pink)  
Sequence identity 92%,  $PS_{APF}$  96%

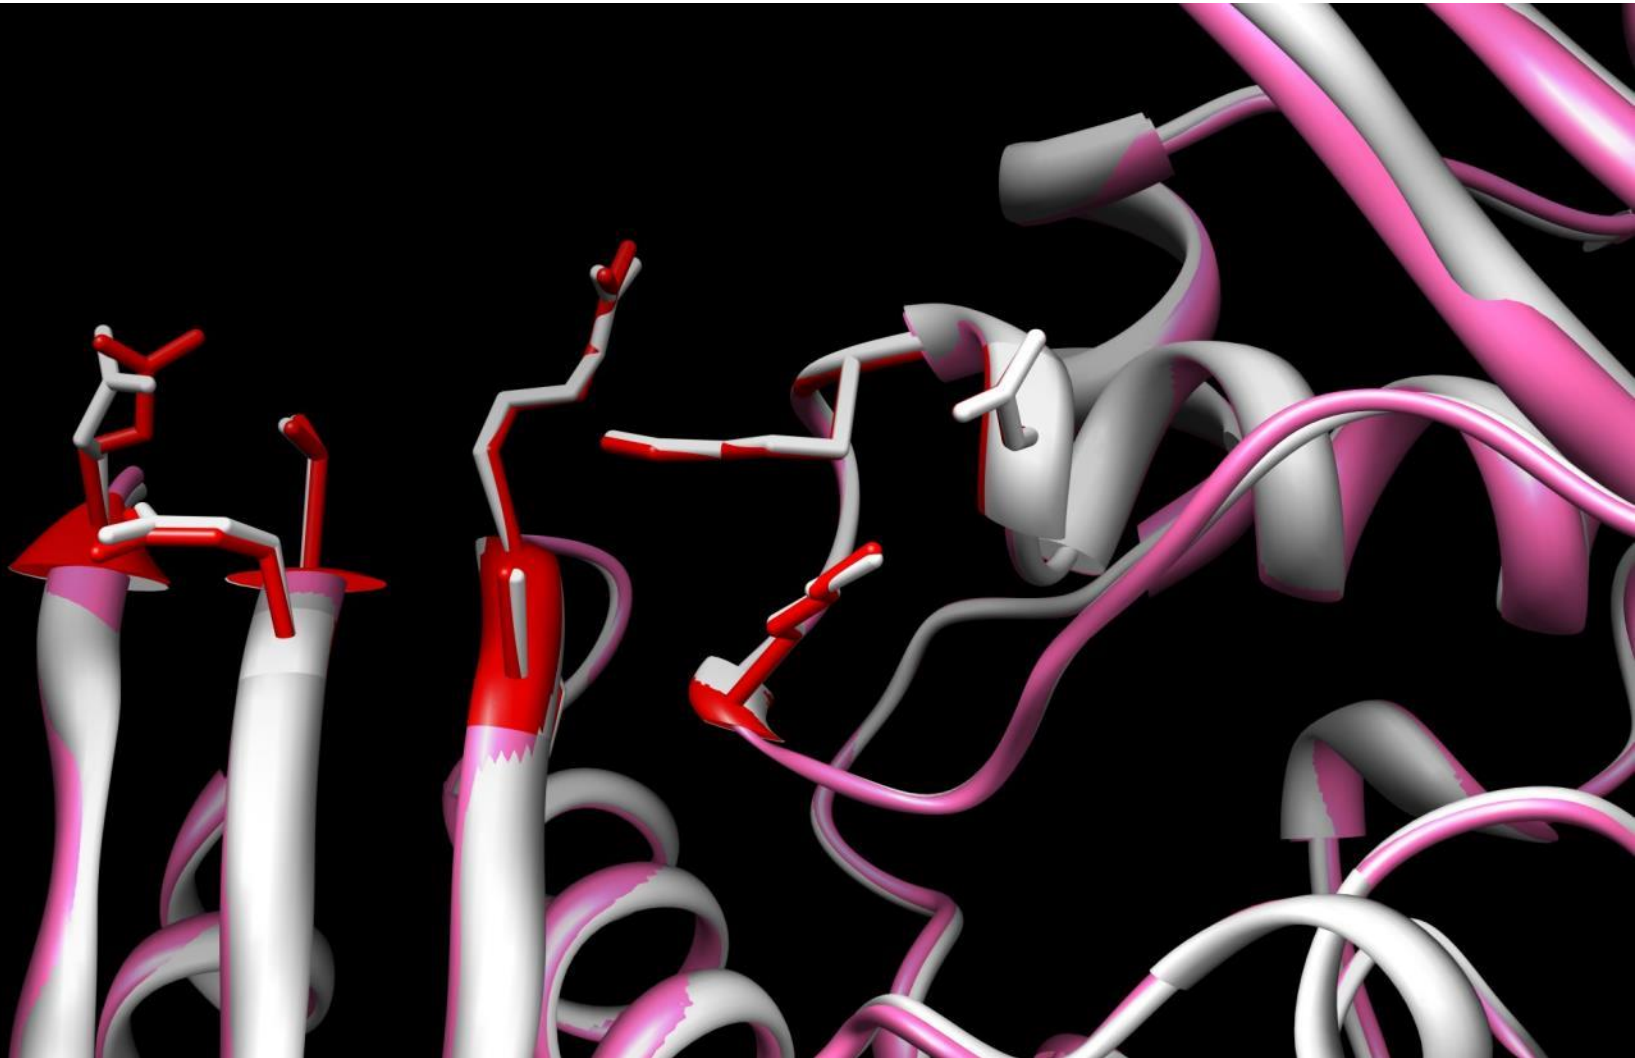



5. Mtb cdd (PDB:3IJF, white), *M. smegmatis* cdd (3MPZ, red/pink)  
Sequence identity 75%,  $PS_{APF}$  94%

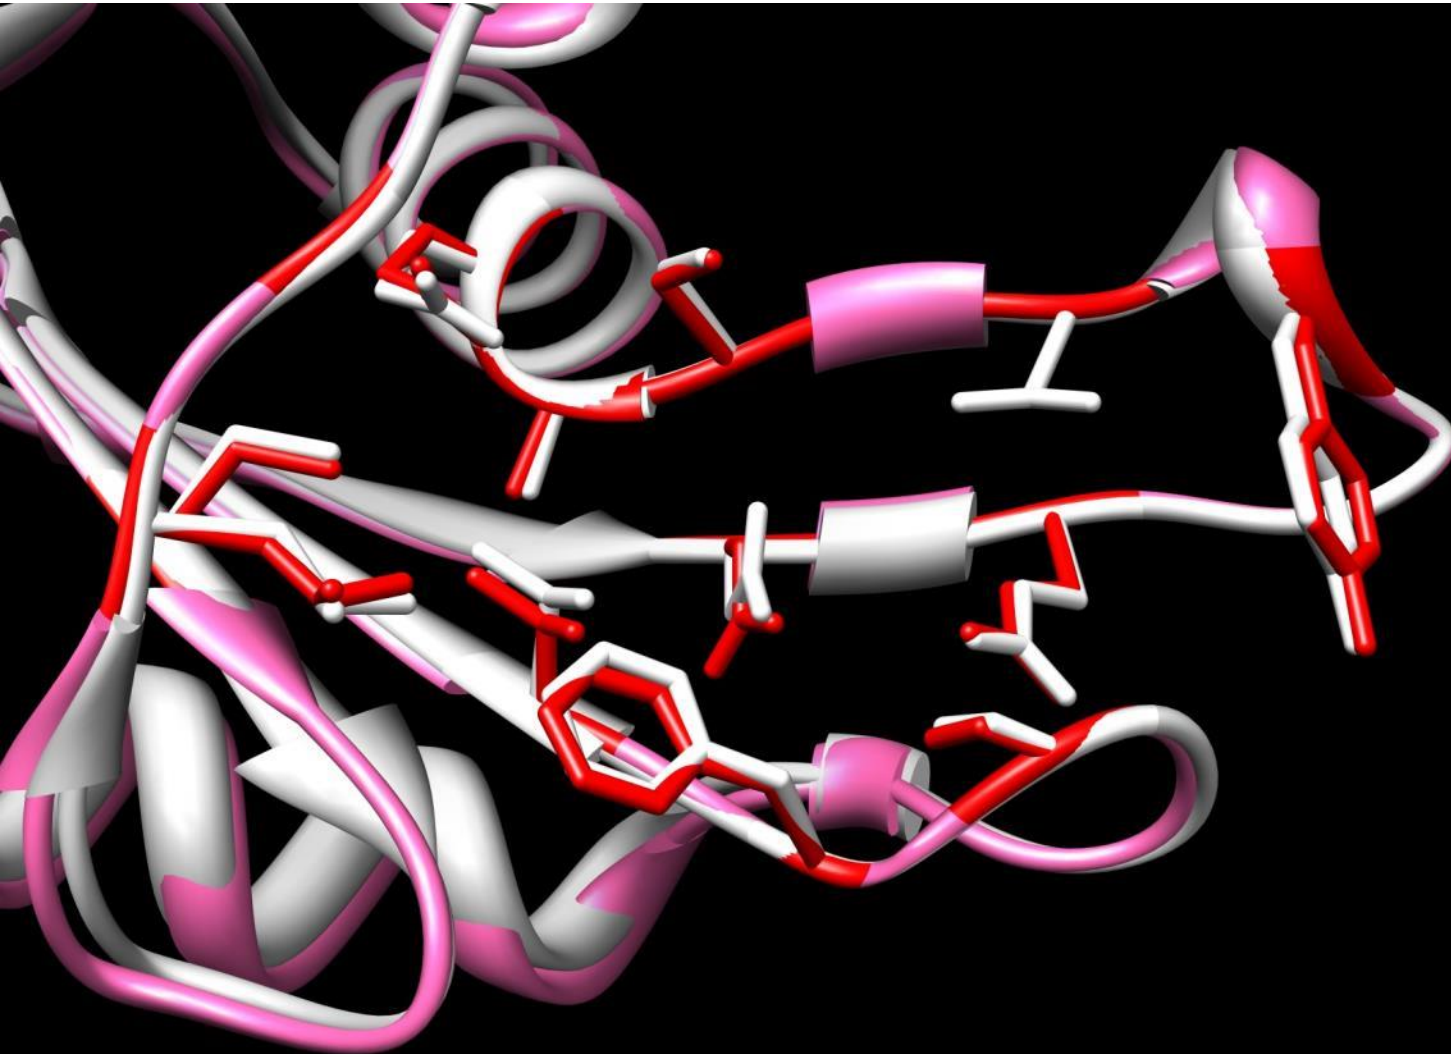

6. Mtb recA (PDB:1G19, white), *M. smegmatis* recA (1UBC, red/pink)  
Sequence identity 93%,  $PS_{APF}$  94%

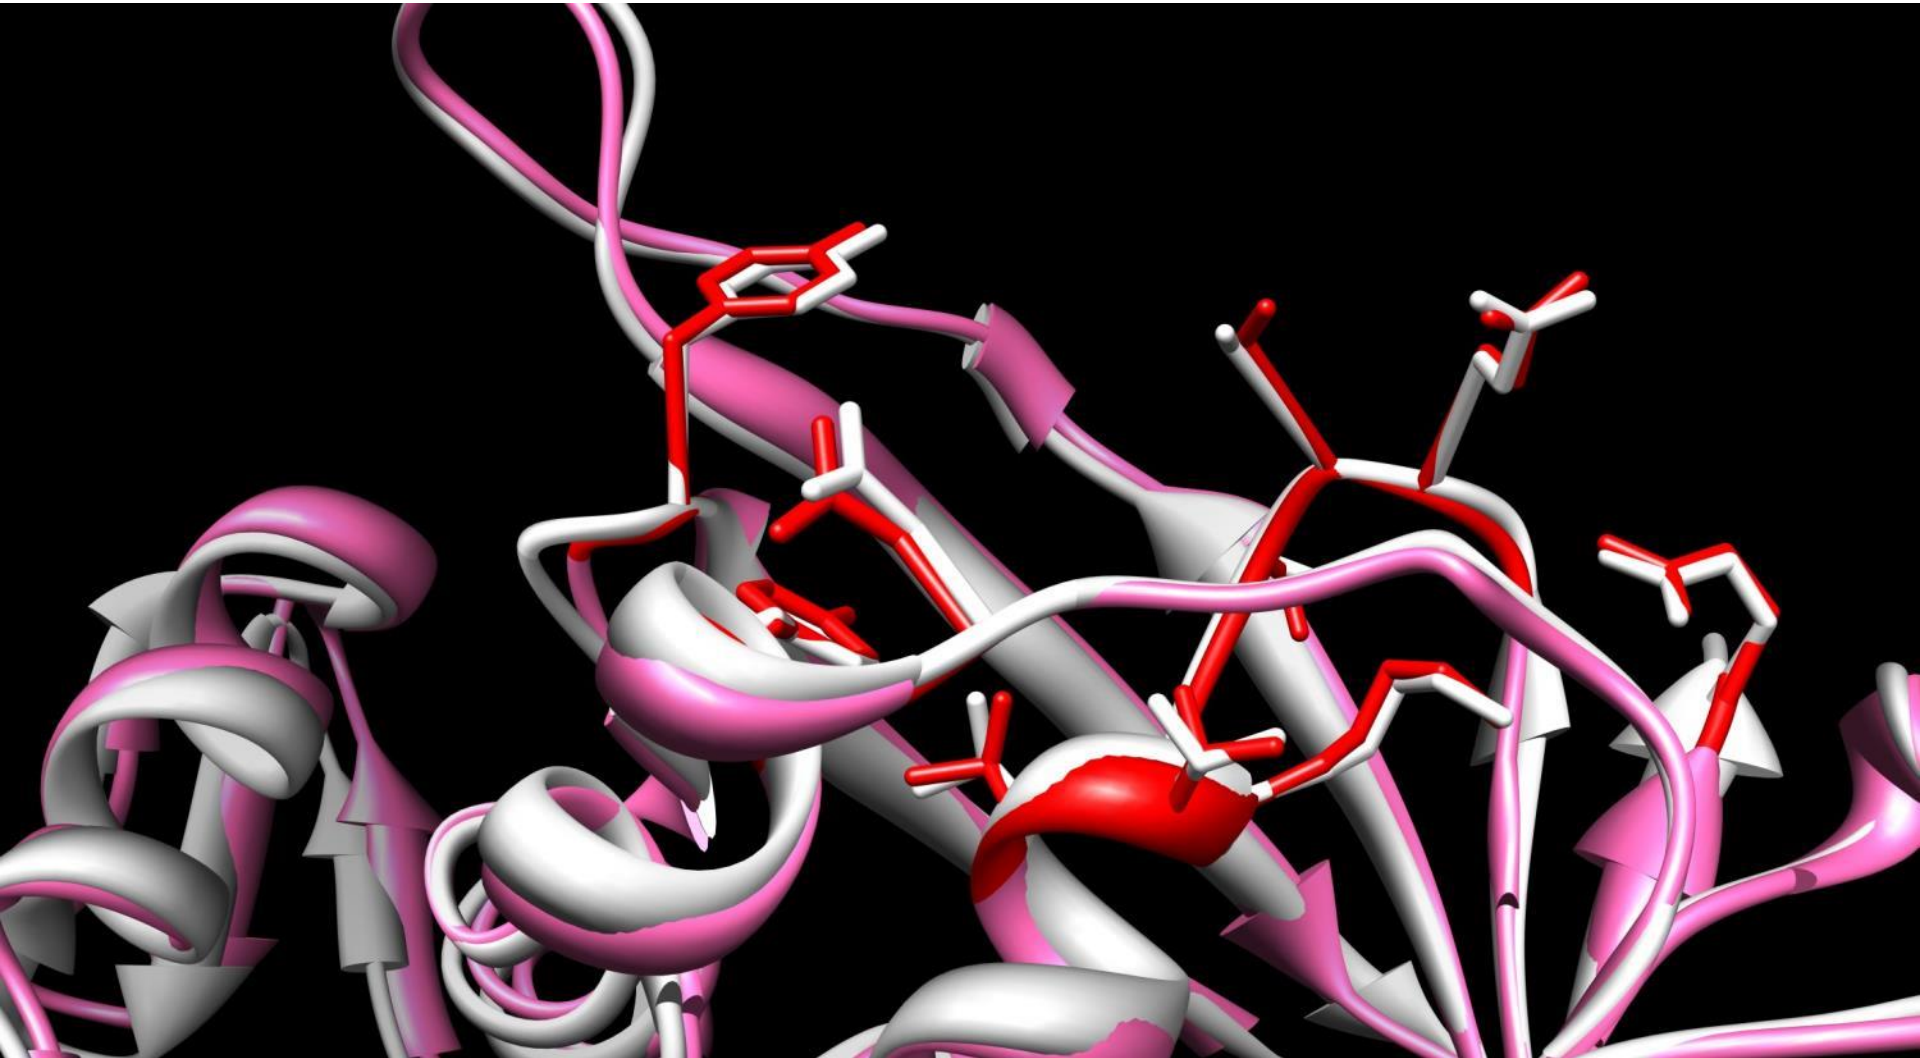

7. Mtb cdd (PDB:3IJF, white), *M. marinum* cdd (4F3W, red/pink)  
Sequence identity 79%,  $PS_{APF}$  93%

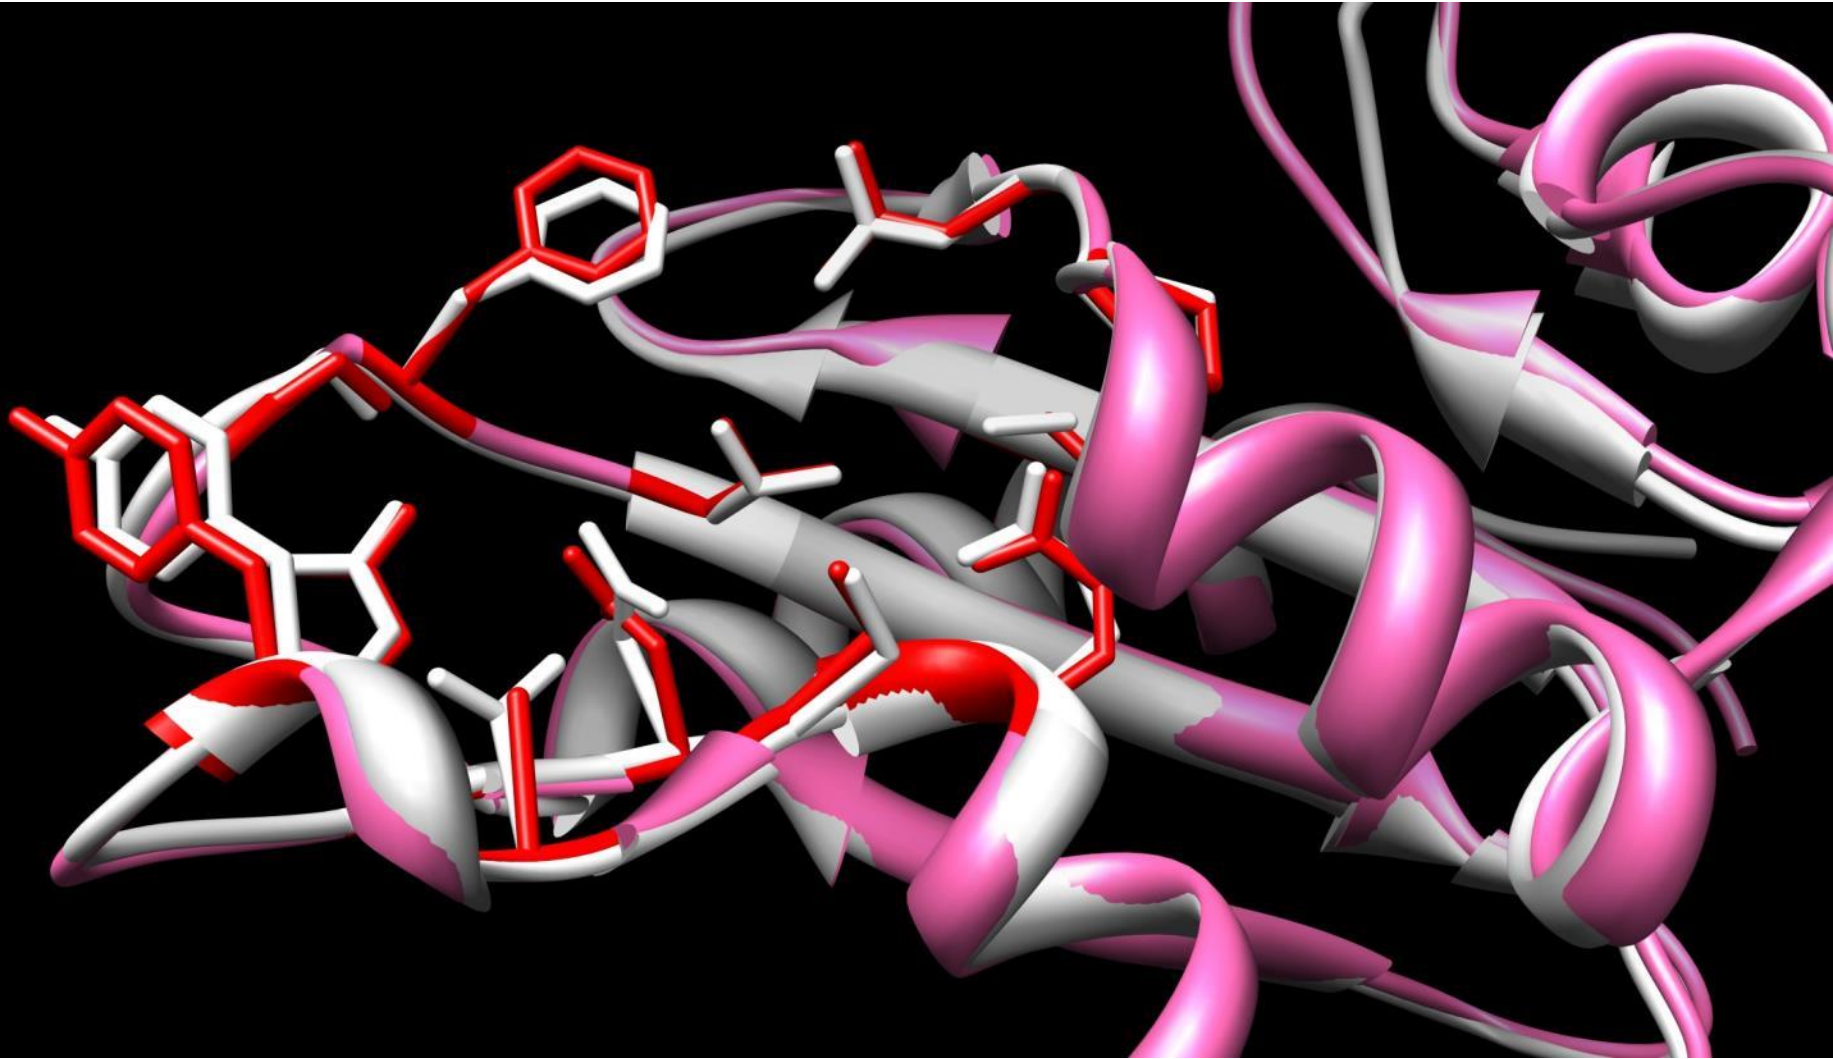



8. Mtb ispD (PDB:2XWN, white), *M. smegmatis* ispD (2XWL, red/pink)  
Sequence identity 63%,  $PS_{APF}$  93%

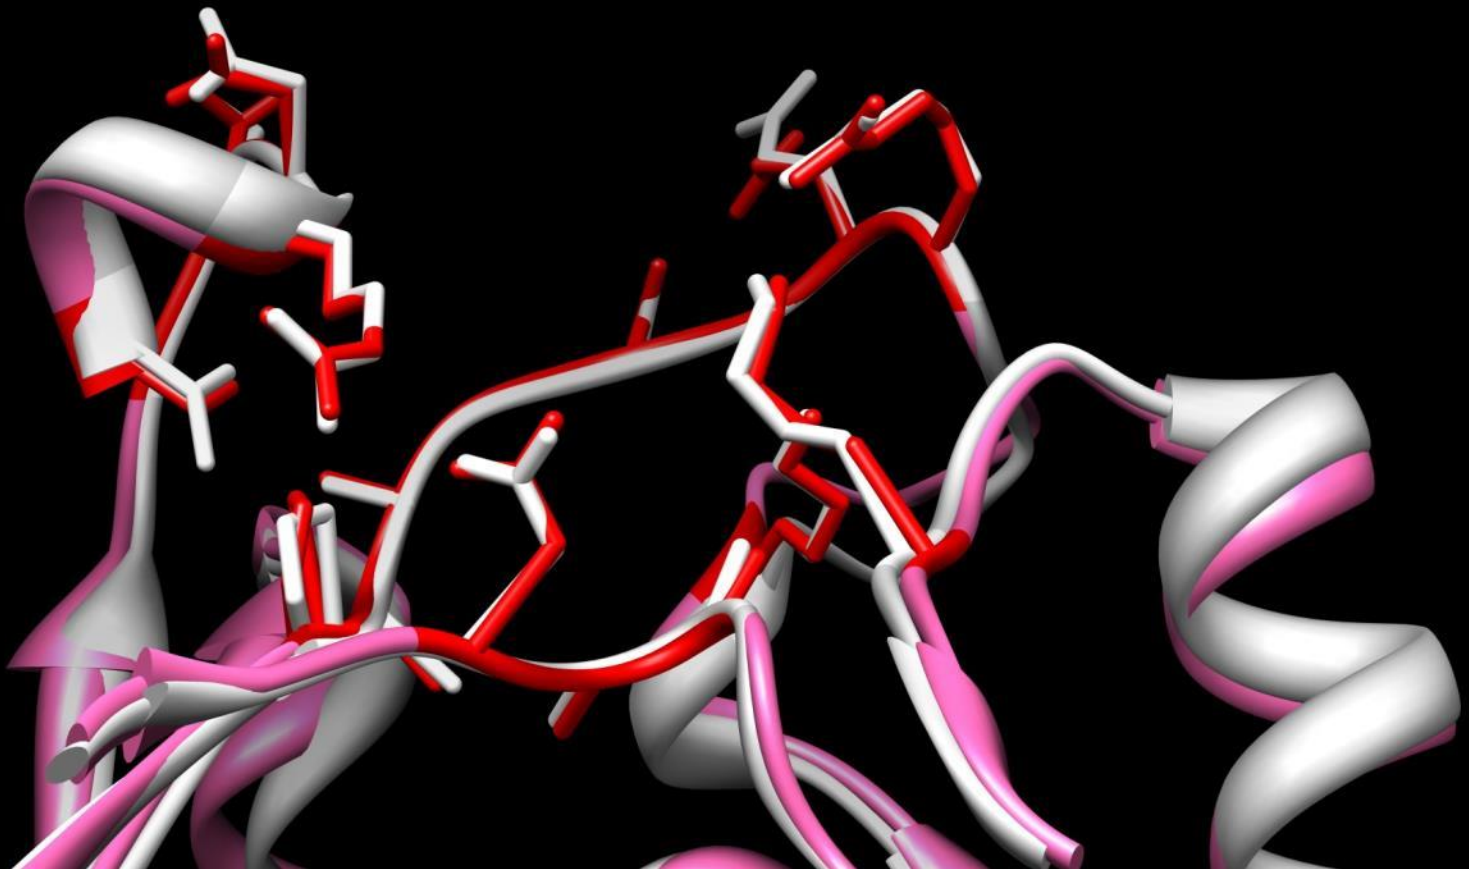

9. Mtb cdd (PDB:3IJF, white), *M. leprae* cdd (3R2N, red/pink)  
Sequence identity 57%,  $PS_{APF}$  92%

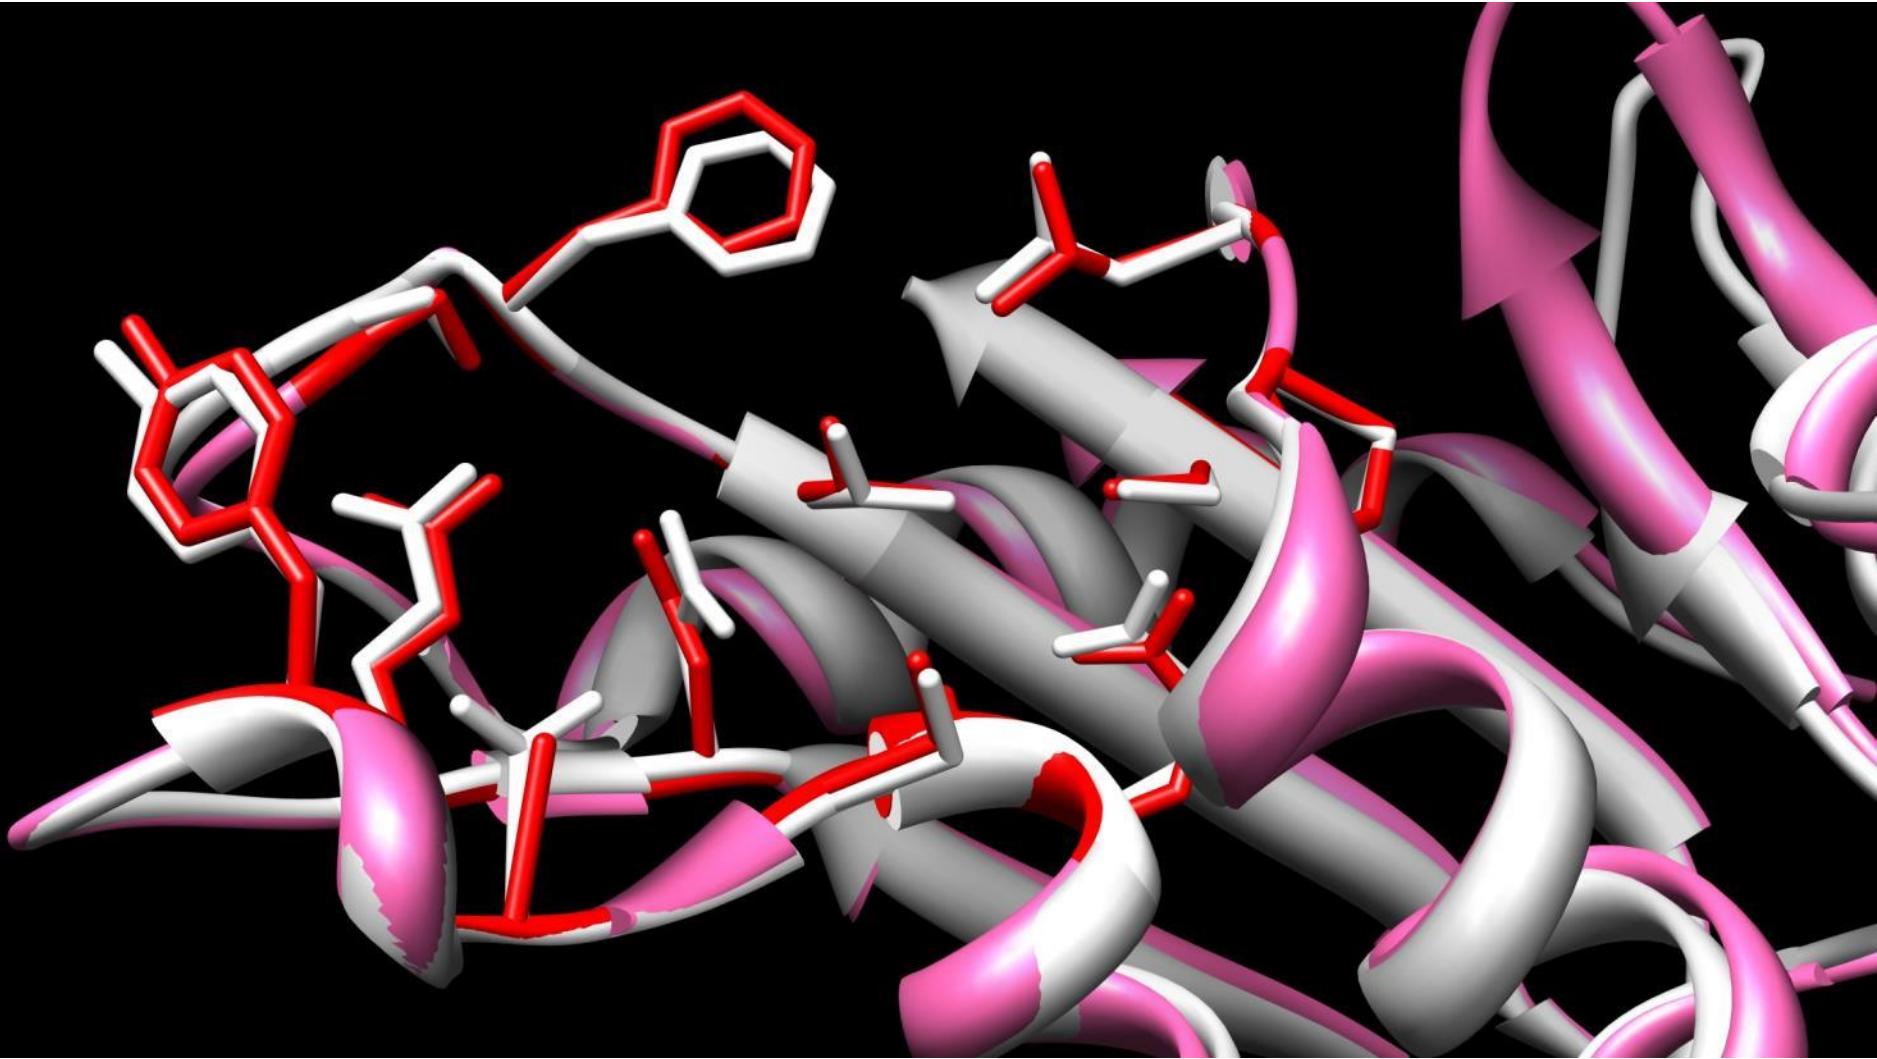

10. Mtb gabG4 (PDB:3V1T, white), *M. smegmatis* fabG4 (3U0B, red/pink)  
Sequence identity 84%, PS<sub>APF</sub> 92%

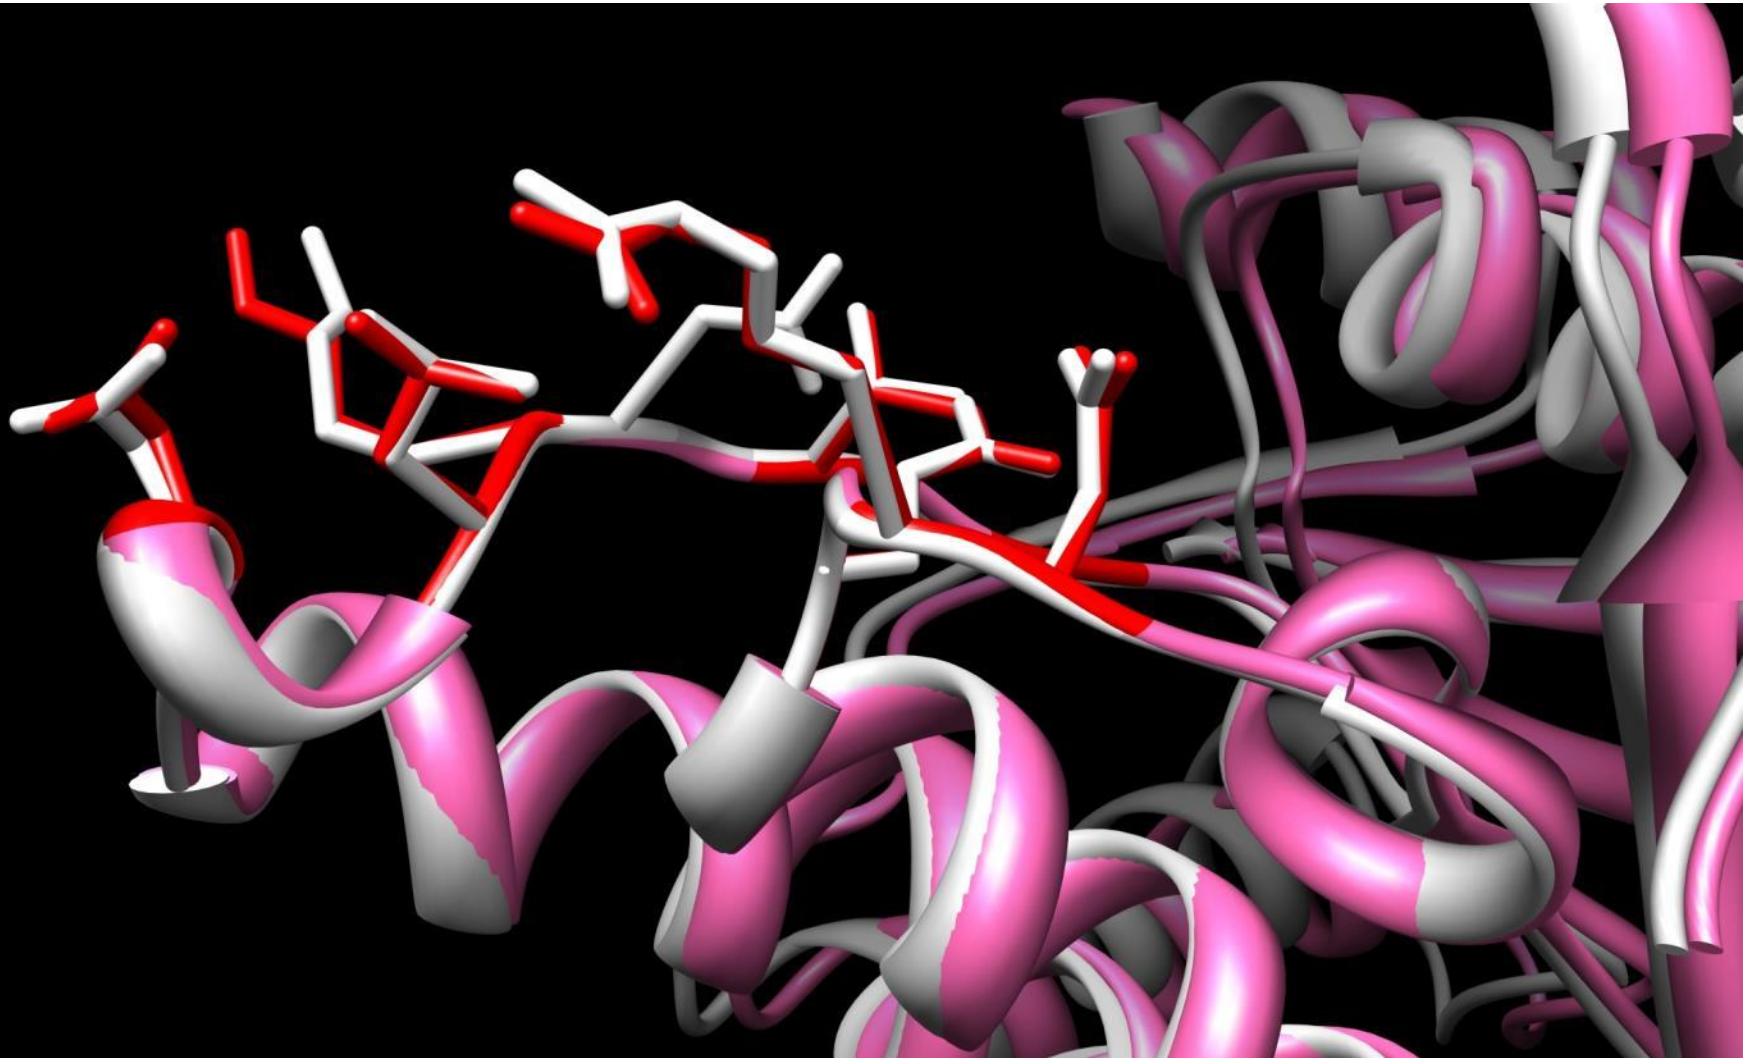



11. Mtb dut (PDB:1MQ7, white), *M. abscessus* dut (4GK6, red/pink)  
Sequence identity 81%,  $PS_{APF}$  90%

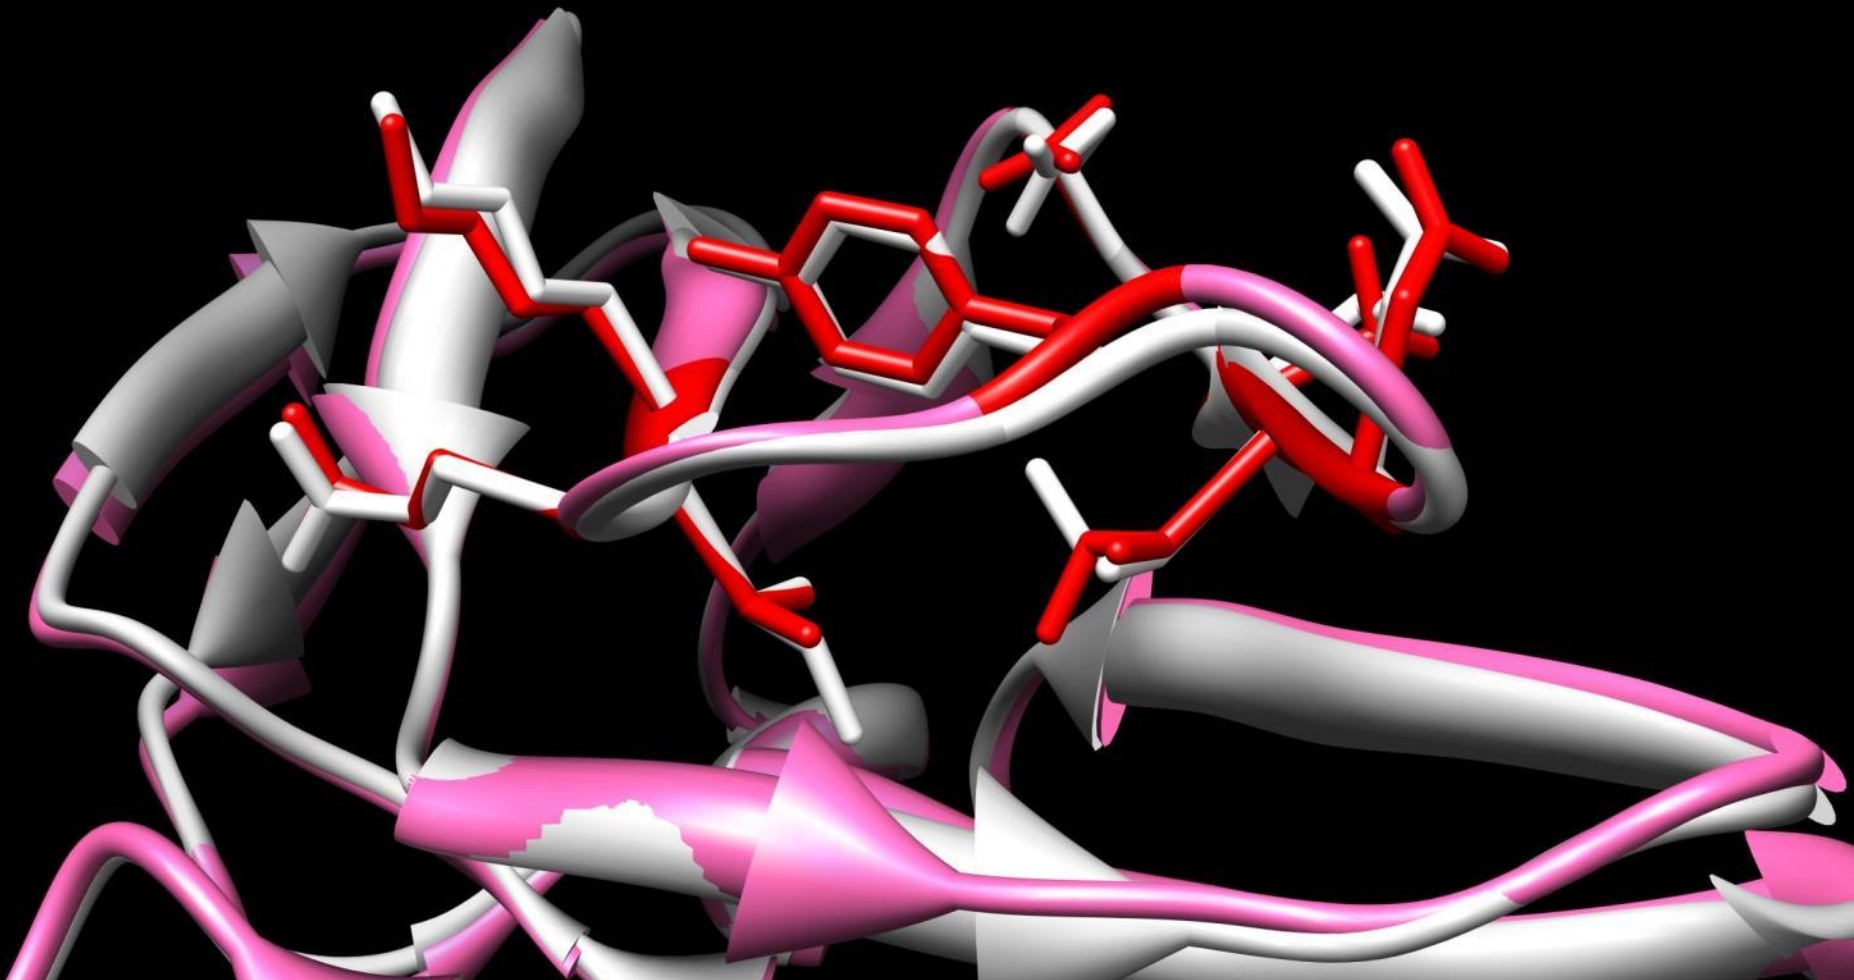



12. Mtb folA (PDB:1DG8, white), *M. avium* folA (2W3V, red/pink)  
Sequence identity 70%,  $PS_{APF}$  90%

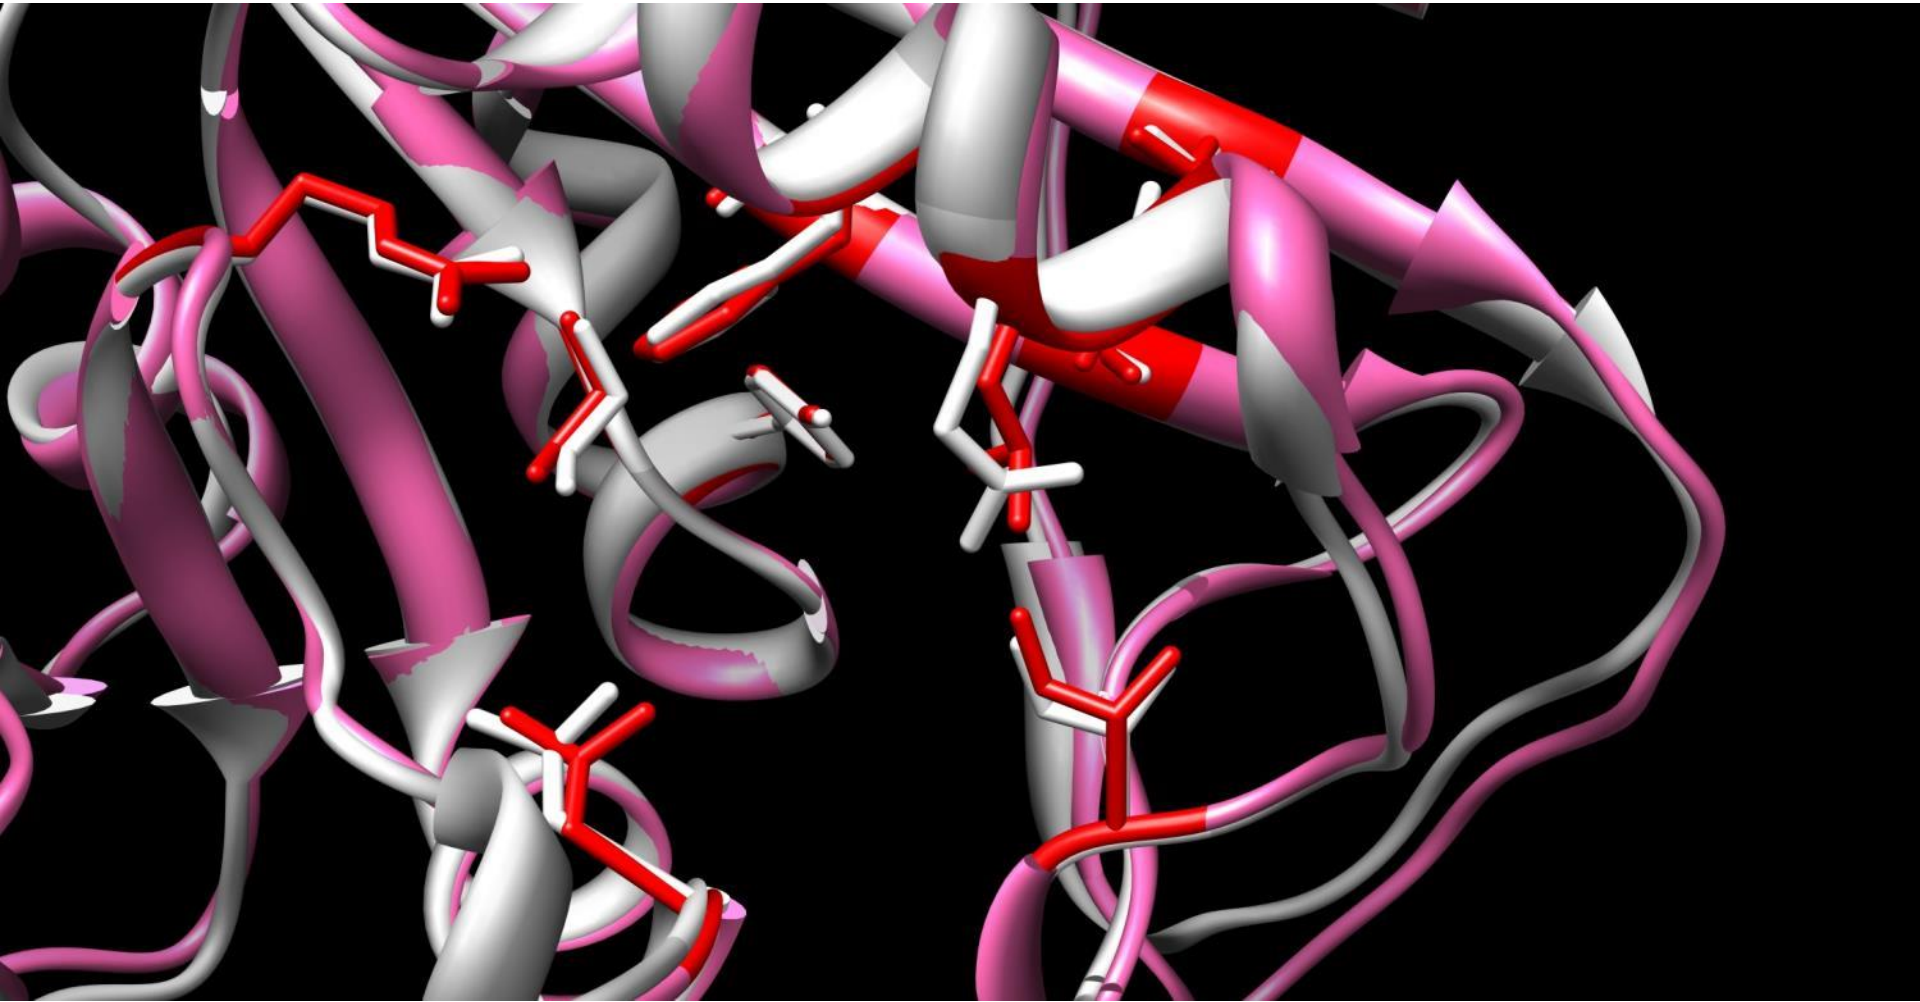

13. Mtb dprE1 (PDB:4FEH, white), *M. smegmatis* MSMEG\_6382 (4AUT, red/pink)  
Sequence identity 84%,  $PS_{APF}$  89%

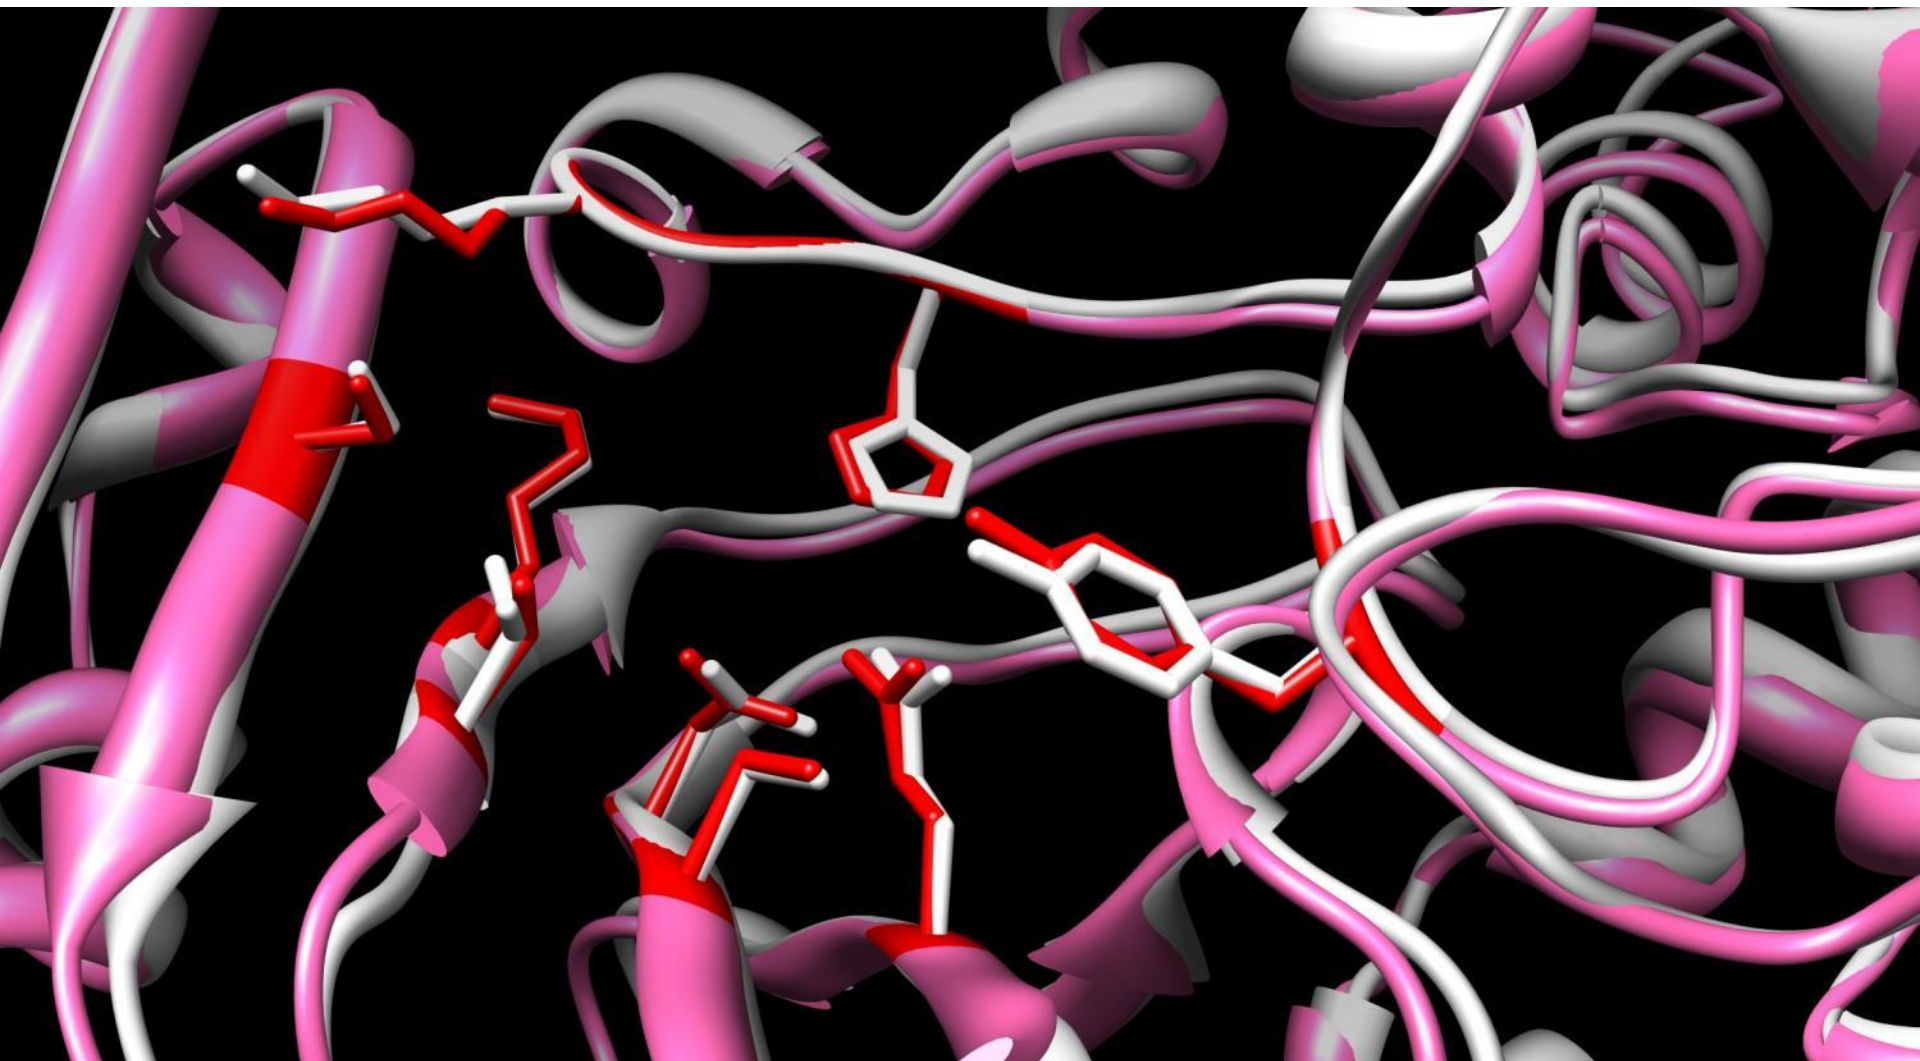

14. Mtb acpS (PDB:3H7Q, white), *M. smegmatis* acpS (3GWM, red/pink)  
Sequence identity 86%,  $PS_{APF}$  89%

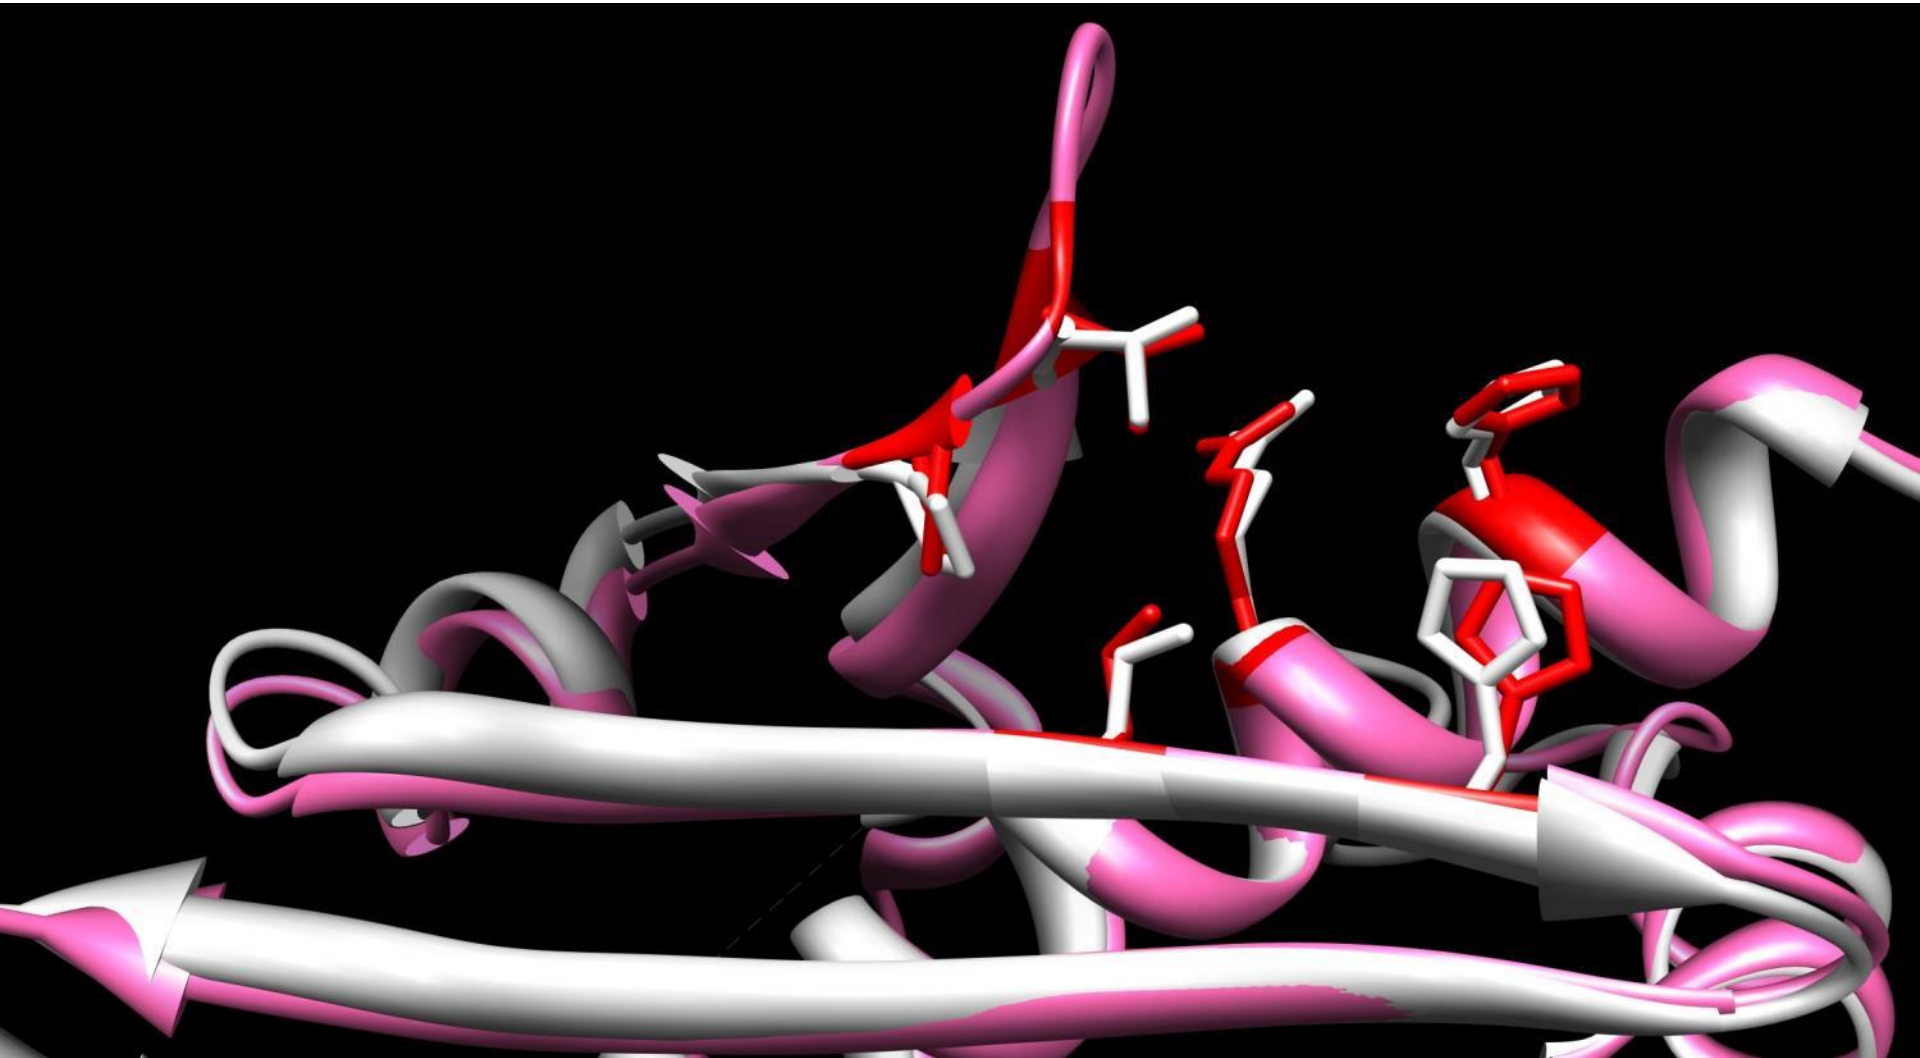



15. Mtb map (PDB:1YJ3, white), *M. abscessus* MAB\_3782c (3TAV, red/pink)  
Sequence identity 26%,  $PS_{APF}$  86%

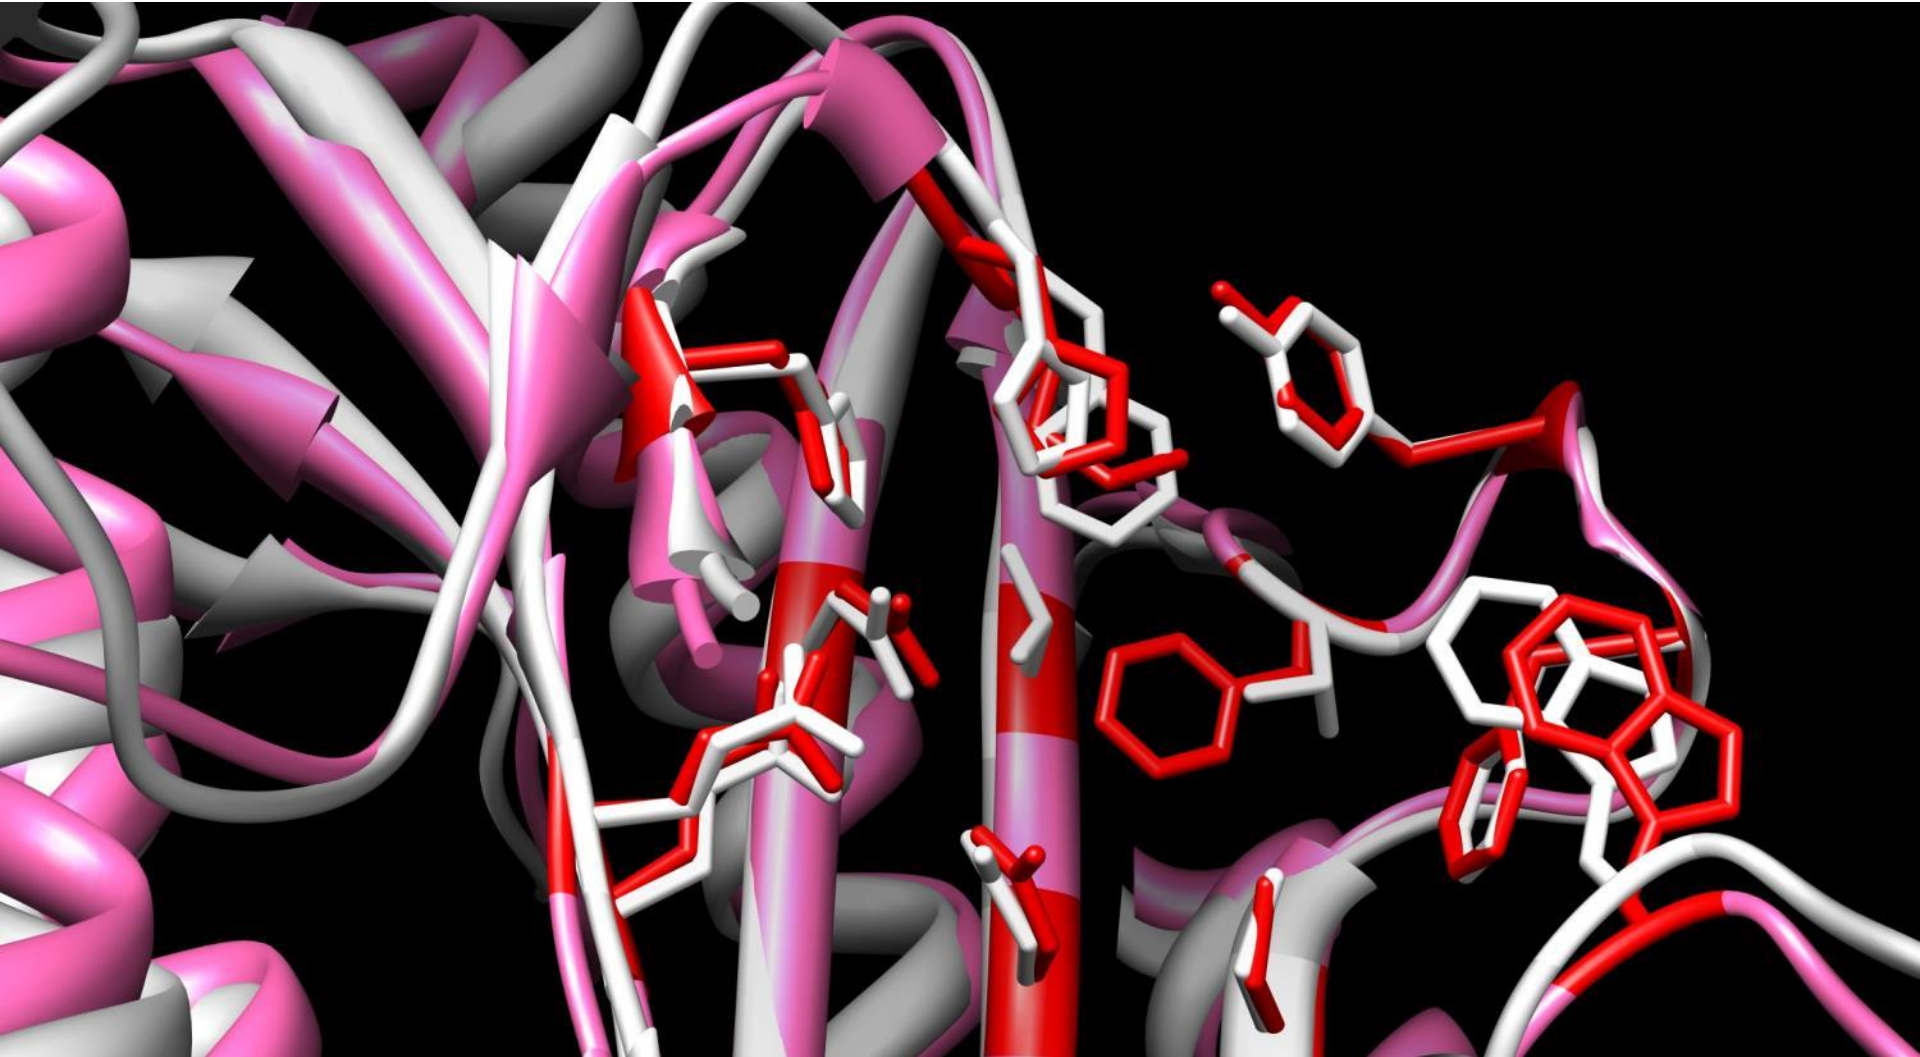



16. Mtb ppa (PDB:1SXV, white), *M. leprae* ppa (4ECP, red/pink)  
Sequence identity 90%,  $PS_{APF}$  85%

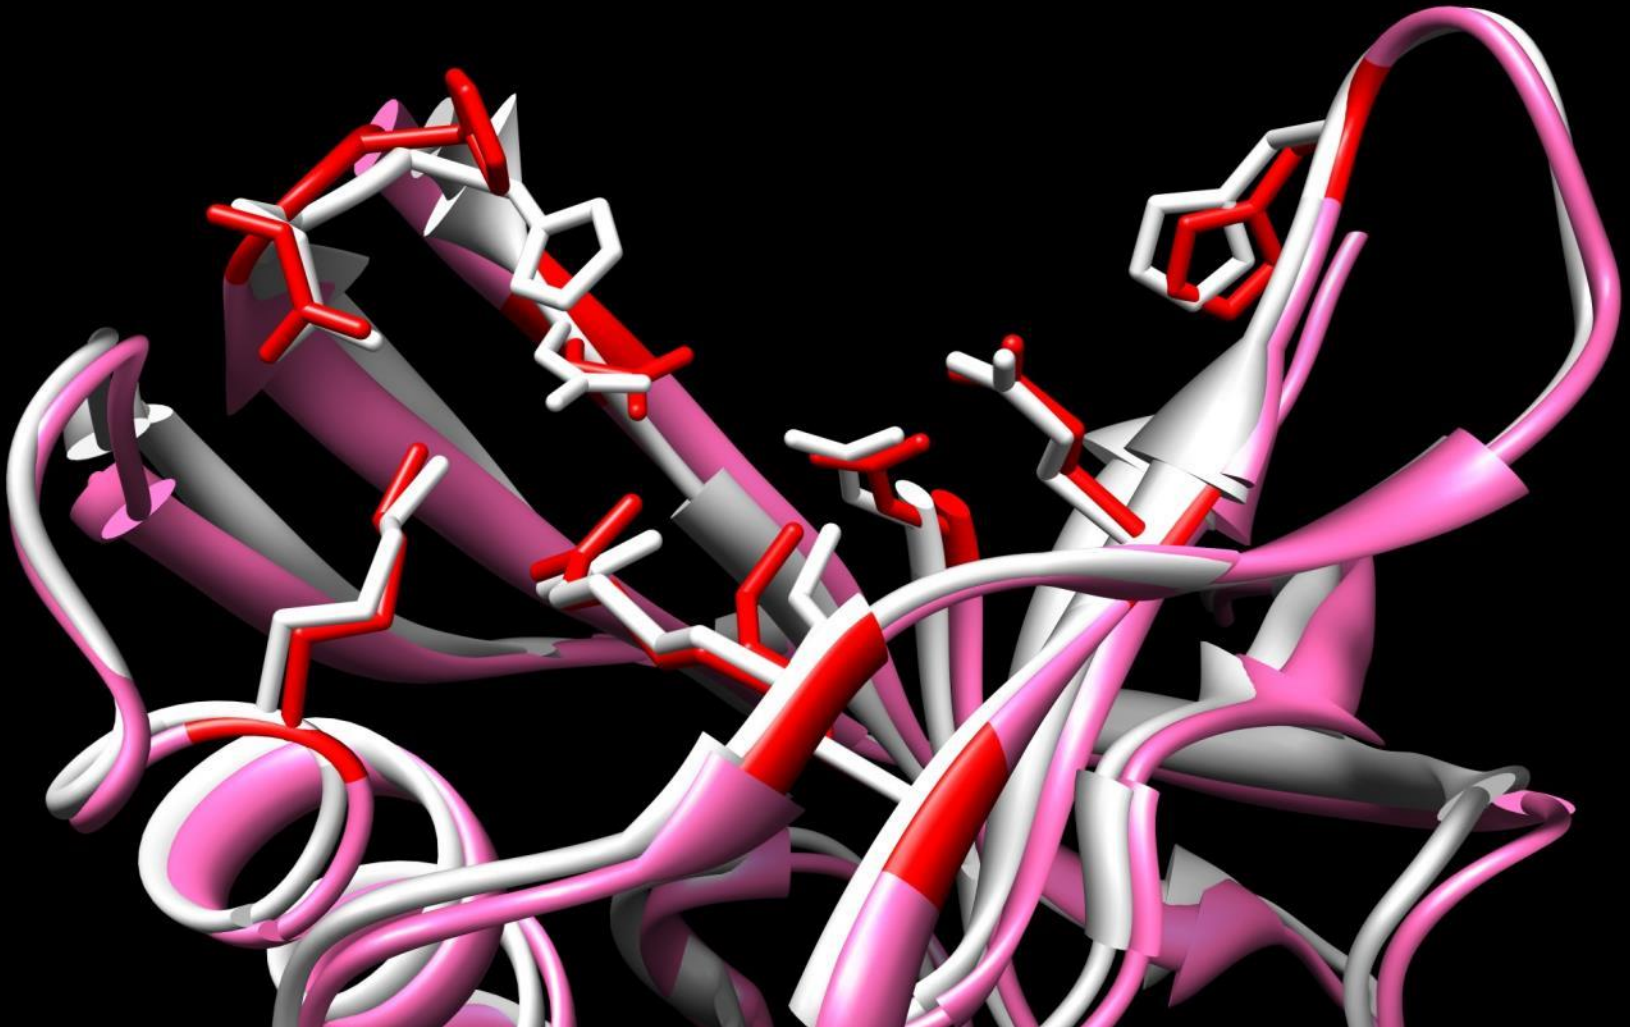

17. Mtb eis (PDB:3R1K, white), *M. smegmatis* eis (3SXN, red/pink)  
Sequence identity 58%,  $PS_{APF}$  85%

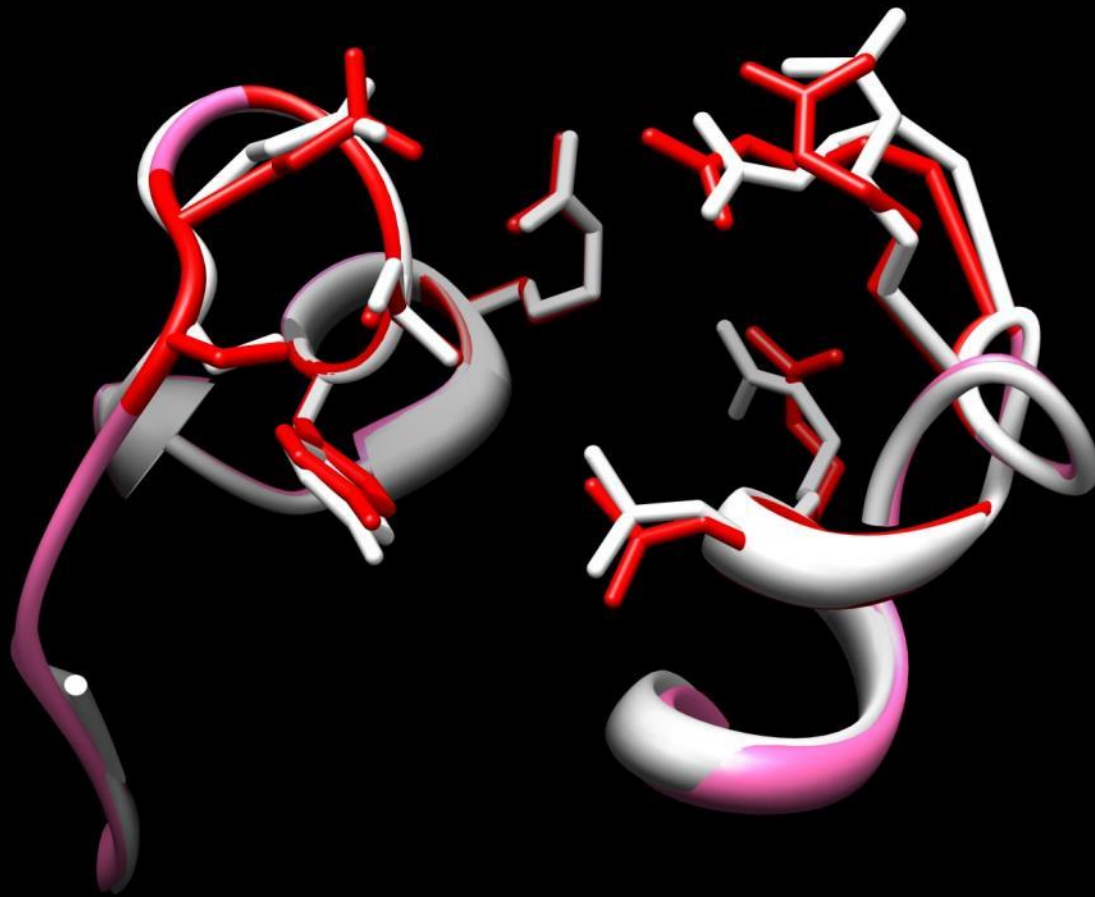

18. Mtb ilvE (PDB:3HT5, white), *M. smegmatis* ilvE (3DTE, red/pink)  
Sequence identity 85%,  $PS_{APF}$  84%

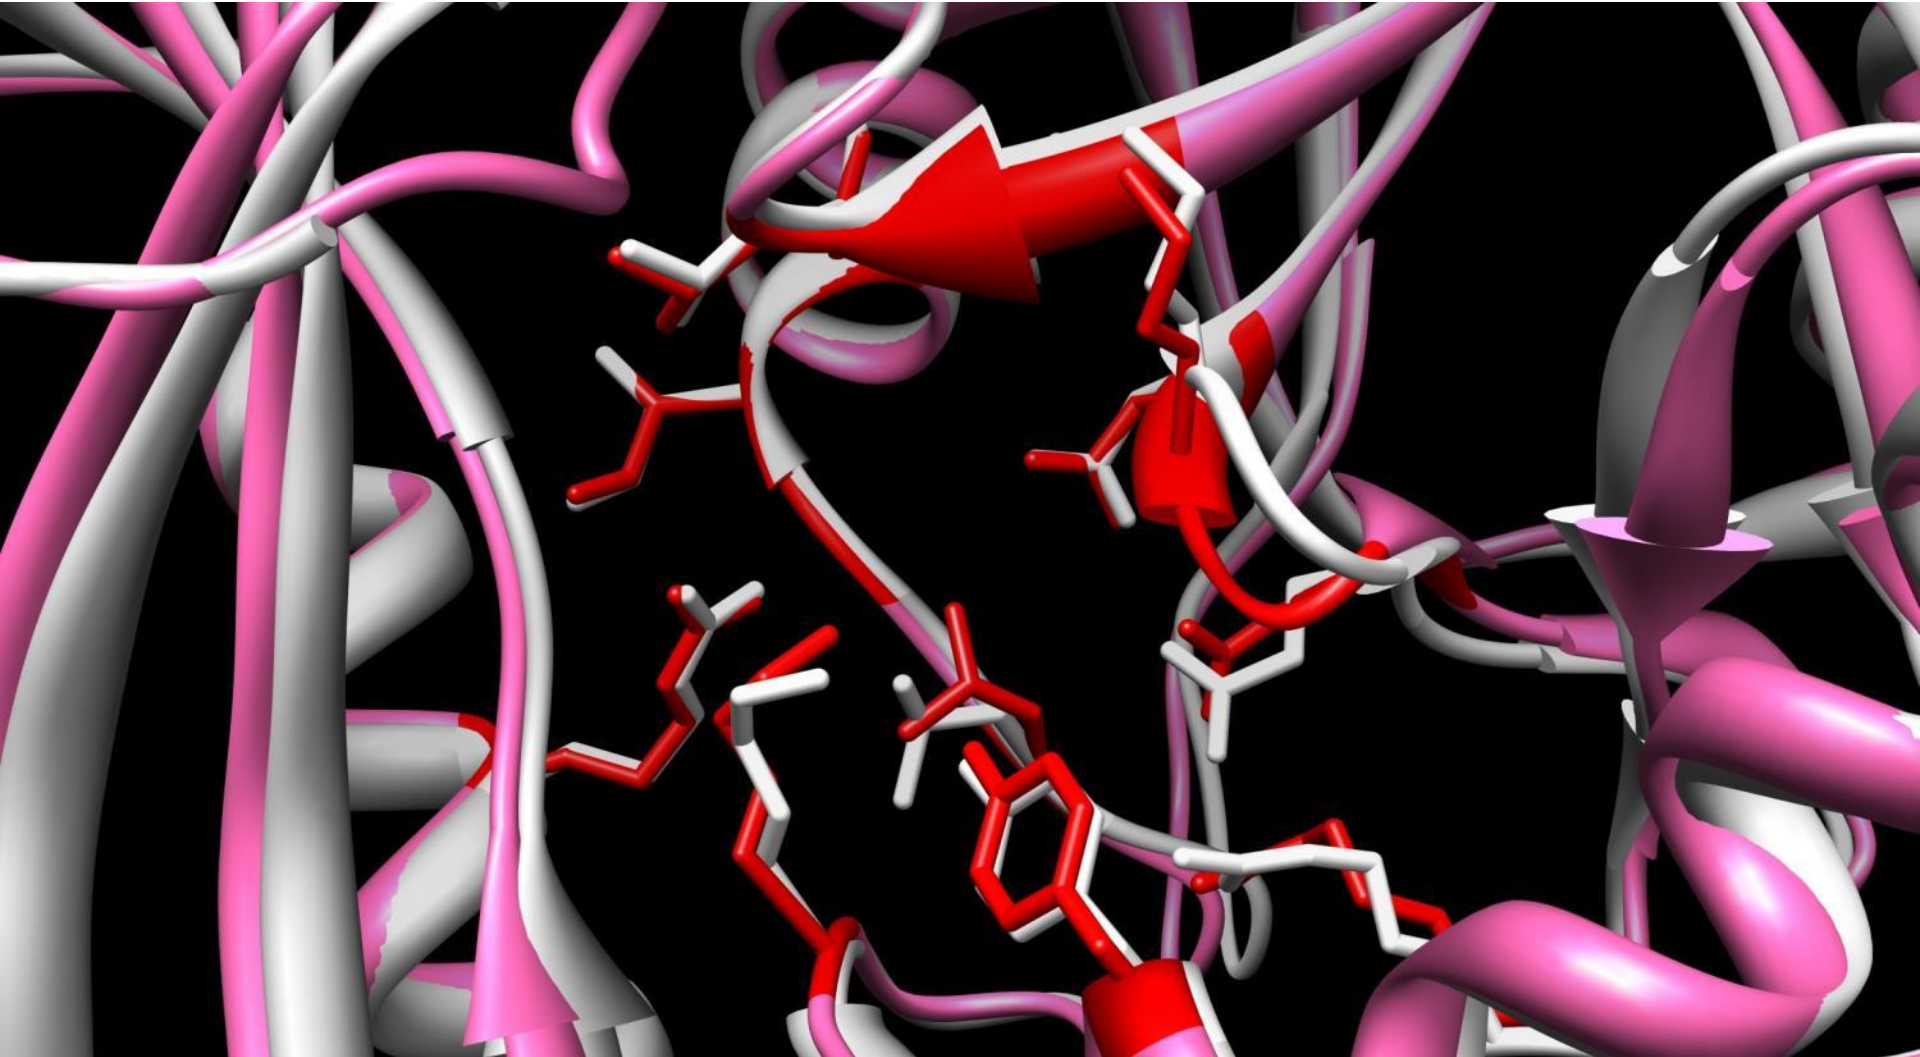

19. Mtb Rv1486 (PDB:3MD0, white), *M. smegmatis* MSMEG\_3160 (3NXS, red/pink)  
Sequence identity 80%,  $PS_{APF}$  83%

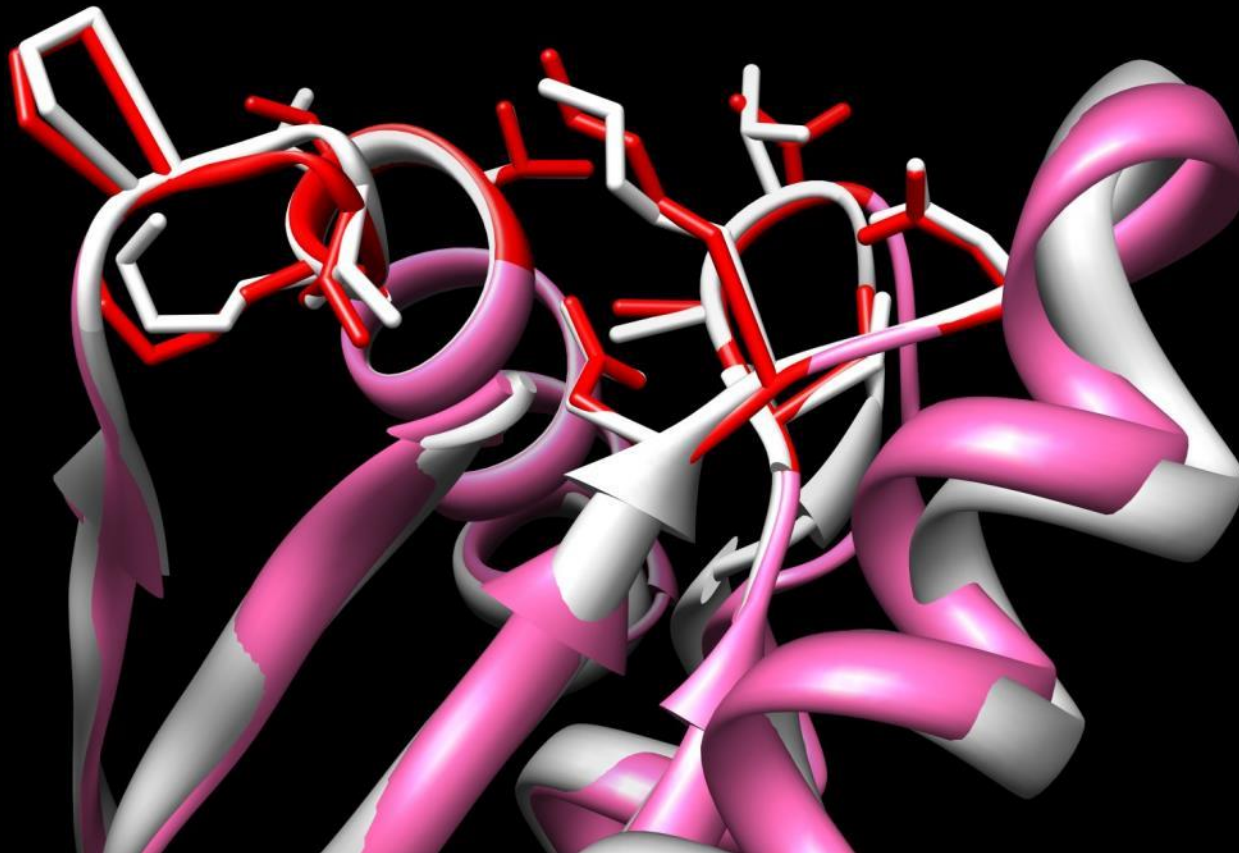



20. Mtb blaA (PDB:2GDN, white), *M. fortuitum* blaF (2CC1, red/pink)  
Sequence identity 39%,  $PS_{APF}$  82%

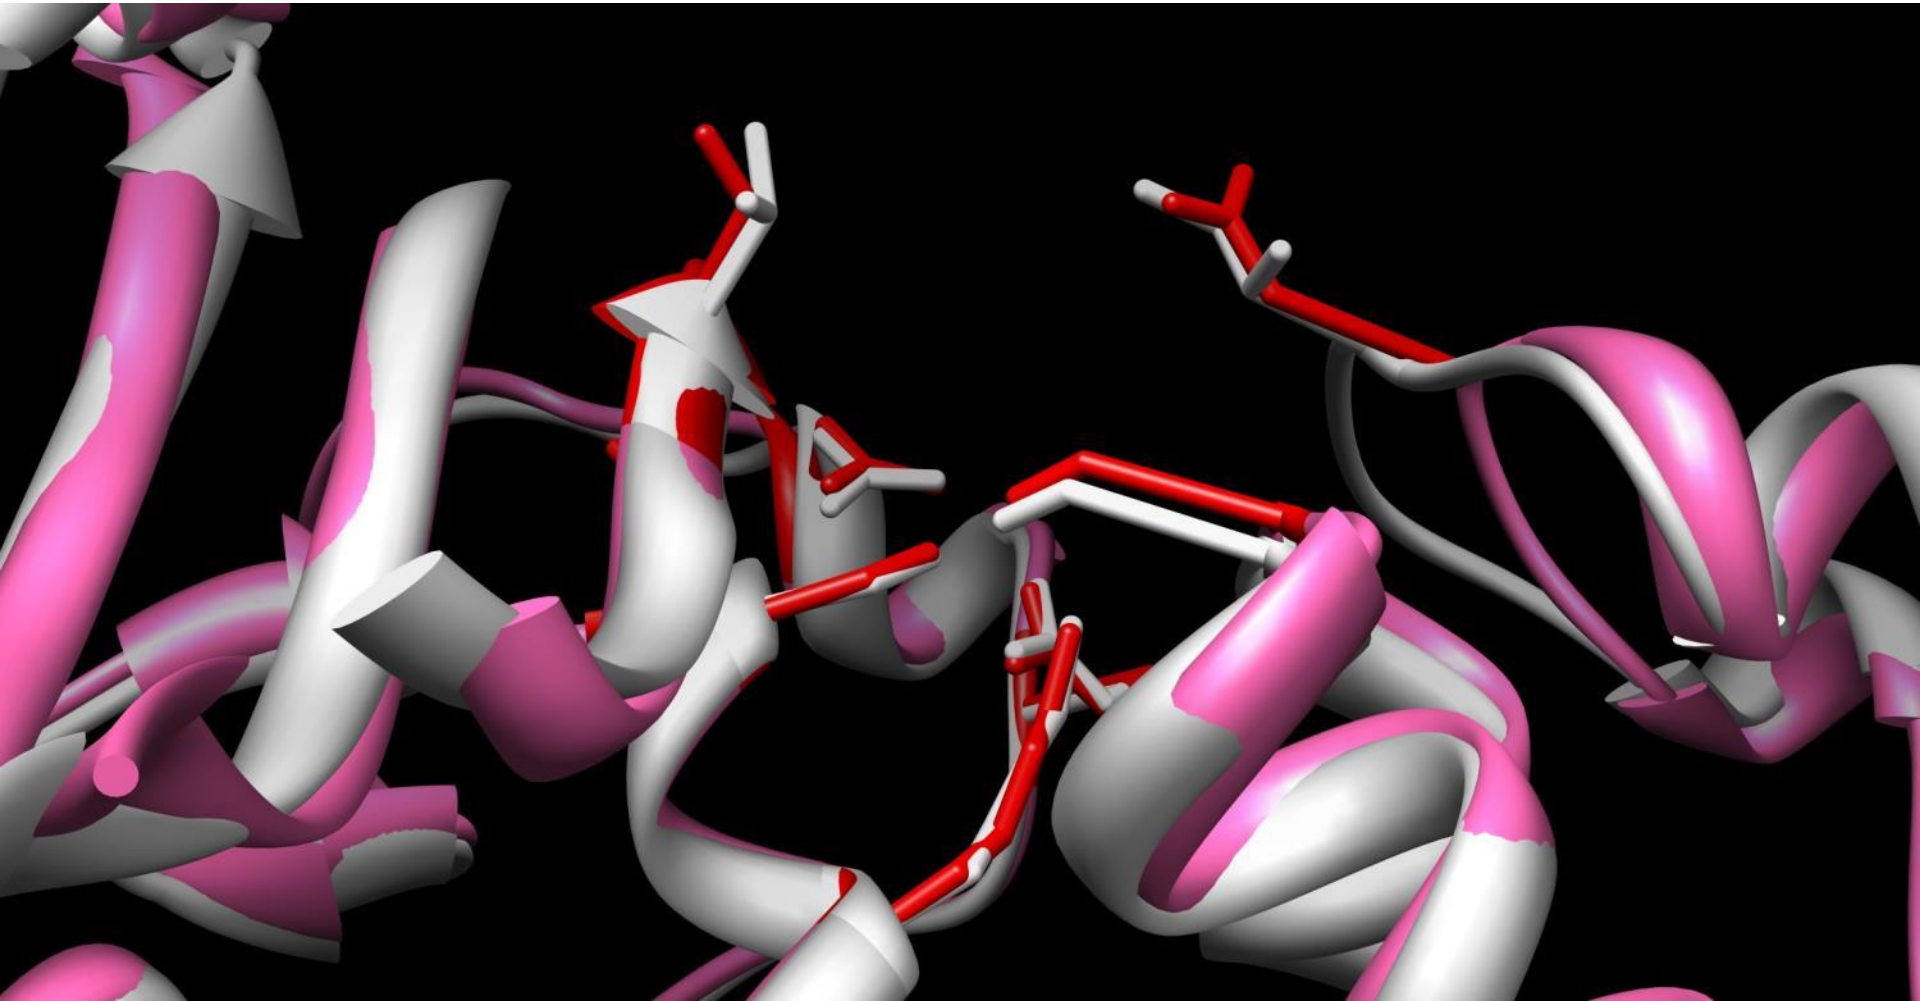

21. Mtb echA8 (PDB:3H81, white), *M. smegmatis* echA8 (3MOY, red/pink)  
Sequence identity 61%,  $PS_{APF}$  79%

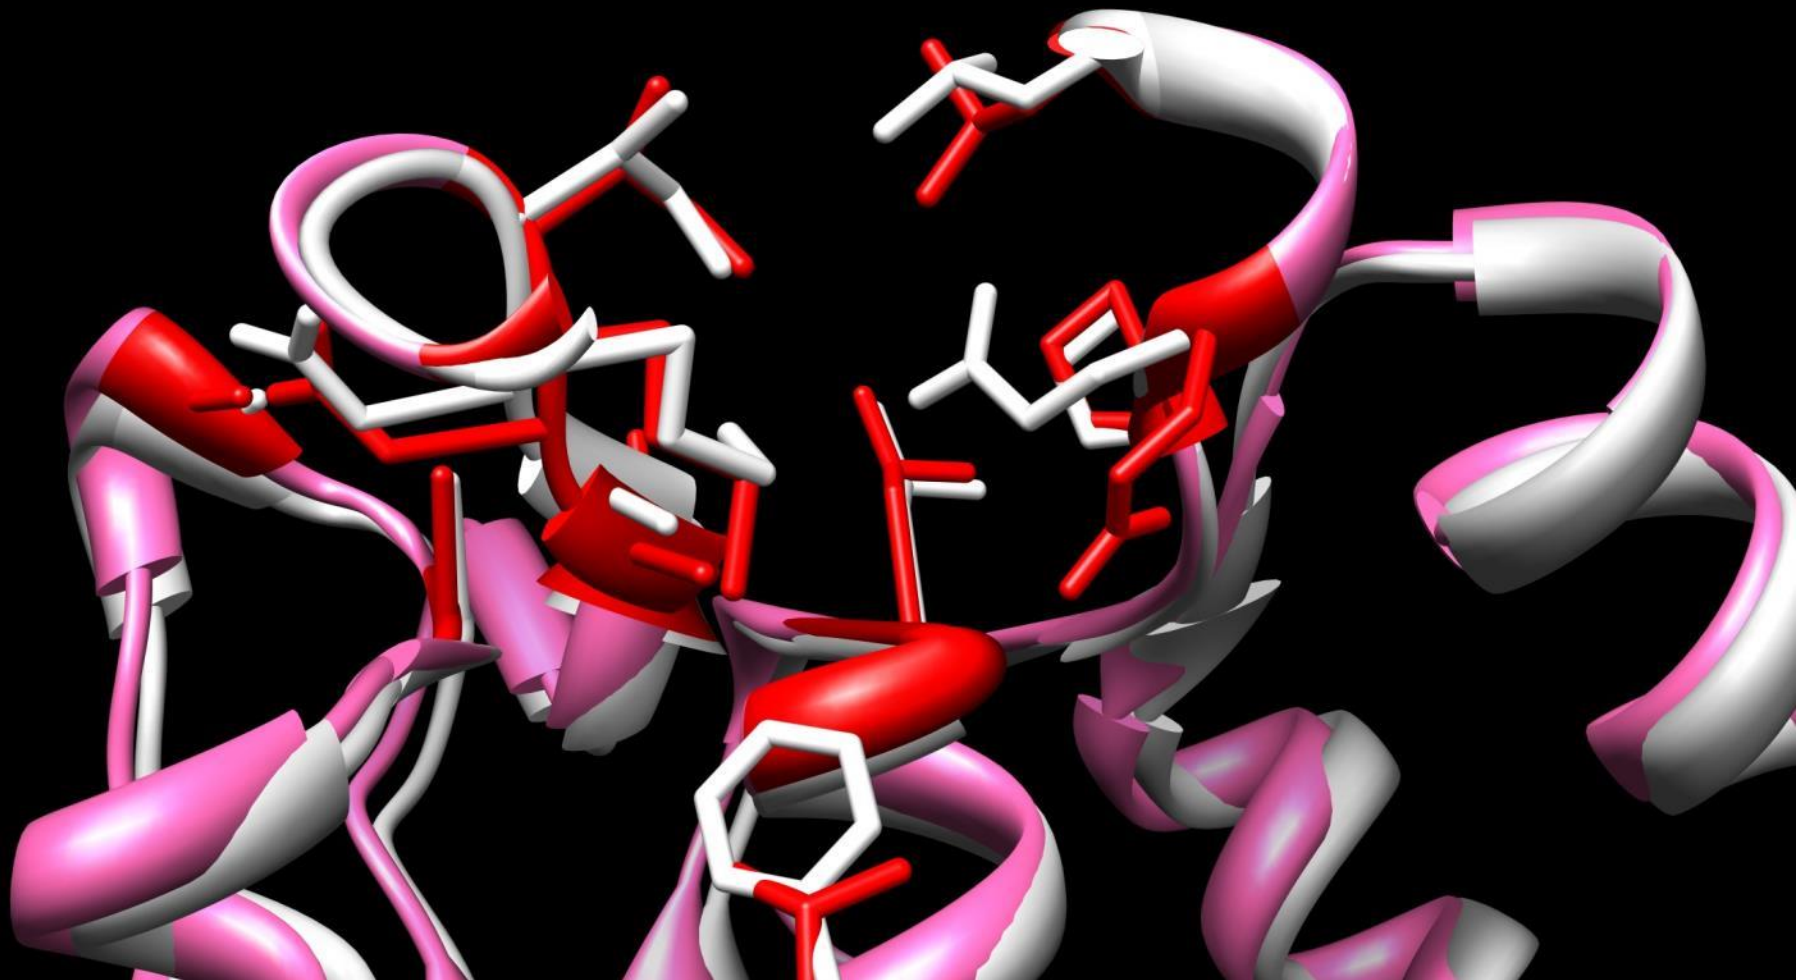

22. Mtb ripA (PDB:3PBI, white), *M. paratuberculosis* MAP\_1204 (3I86, red/pink)  
Sequence identity 78%,  $PS_{APF}$  71%

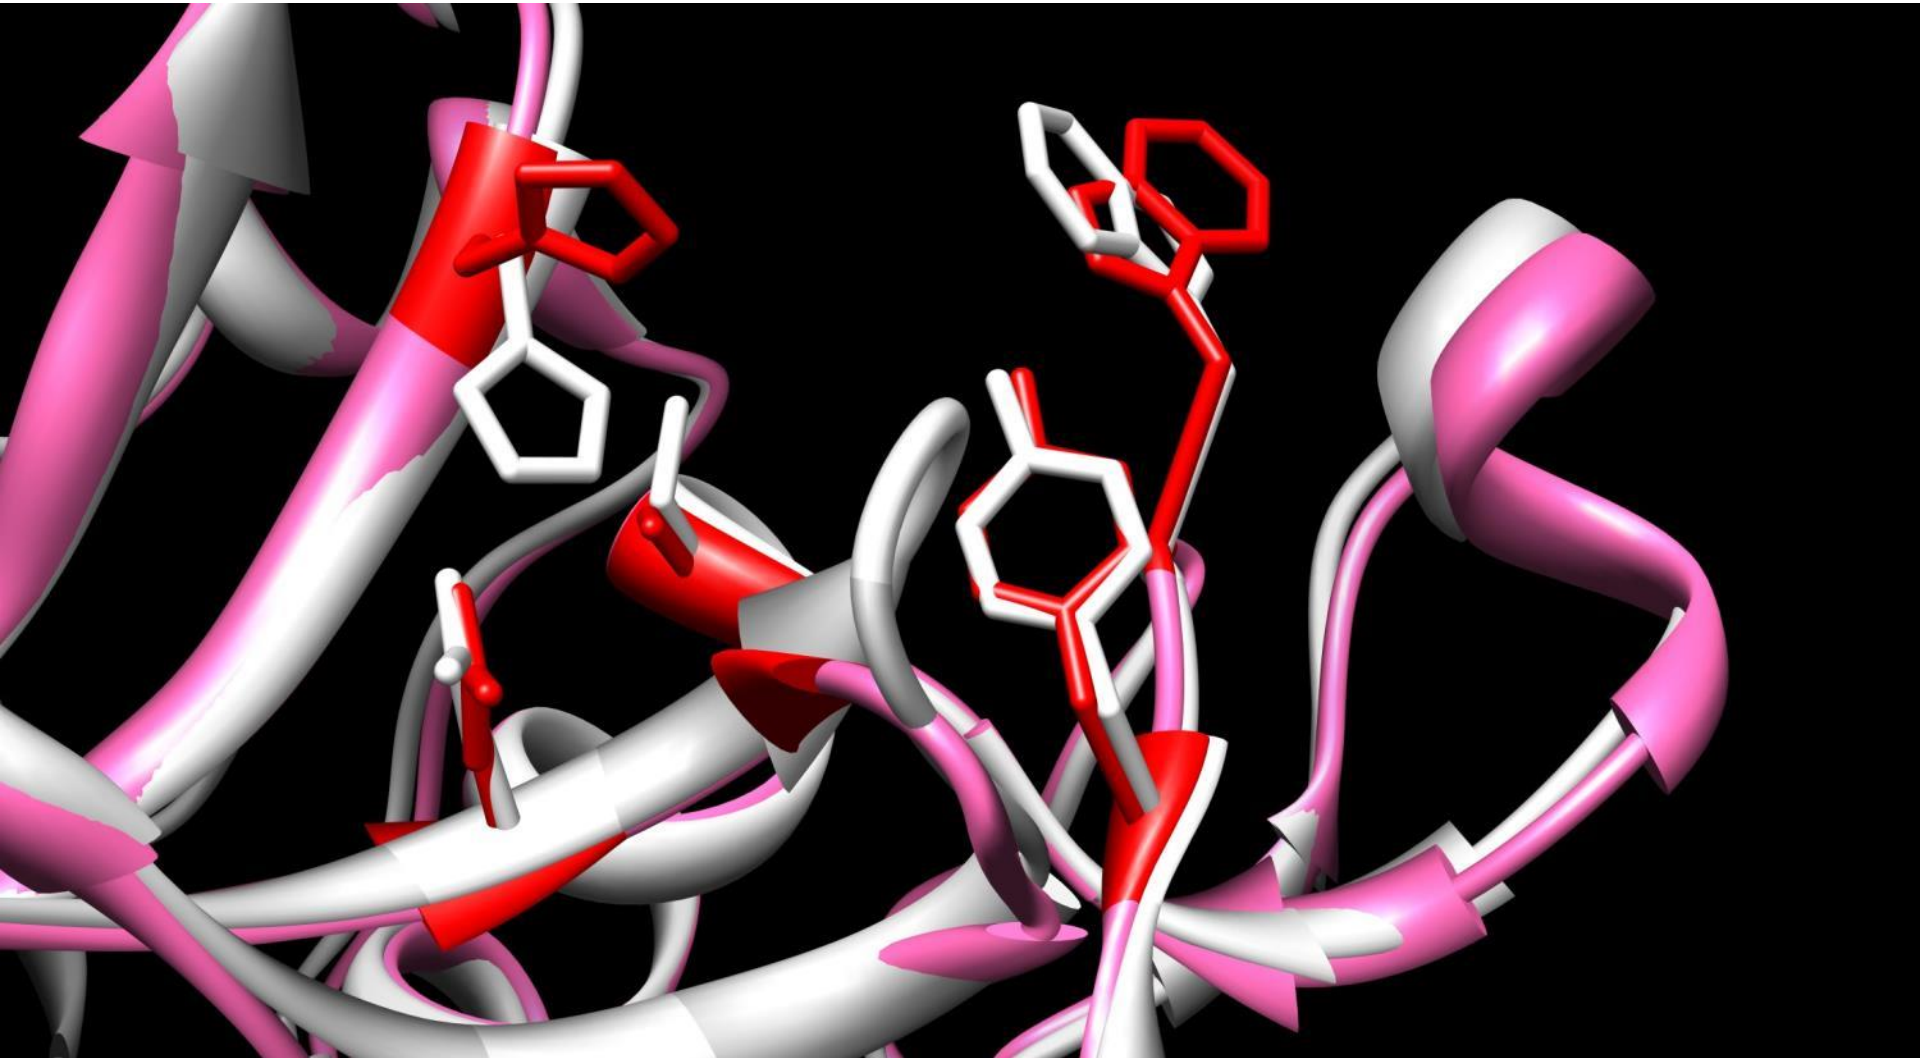



23. Mtb gpgS (PDB:3E25, white), *M. paratuberculosis* MAP\_2569c (3CKQ, red/pink)  
Sequence identity 82%,  $PS_{APF}$  71%

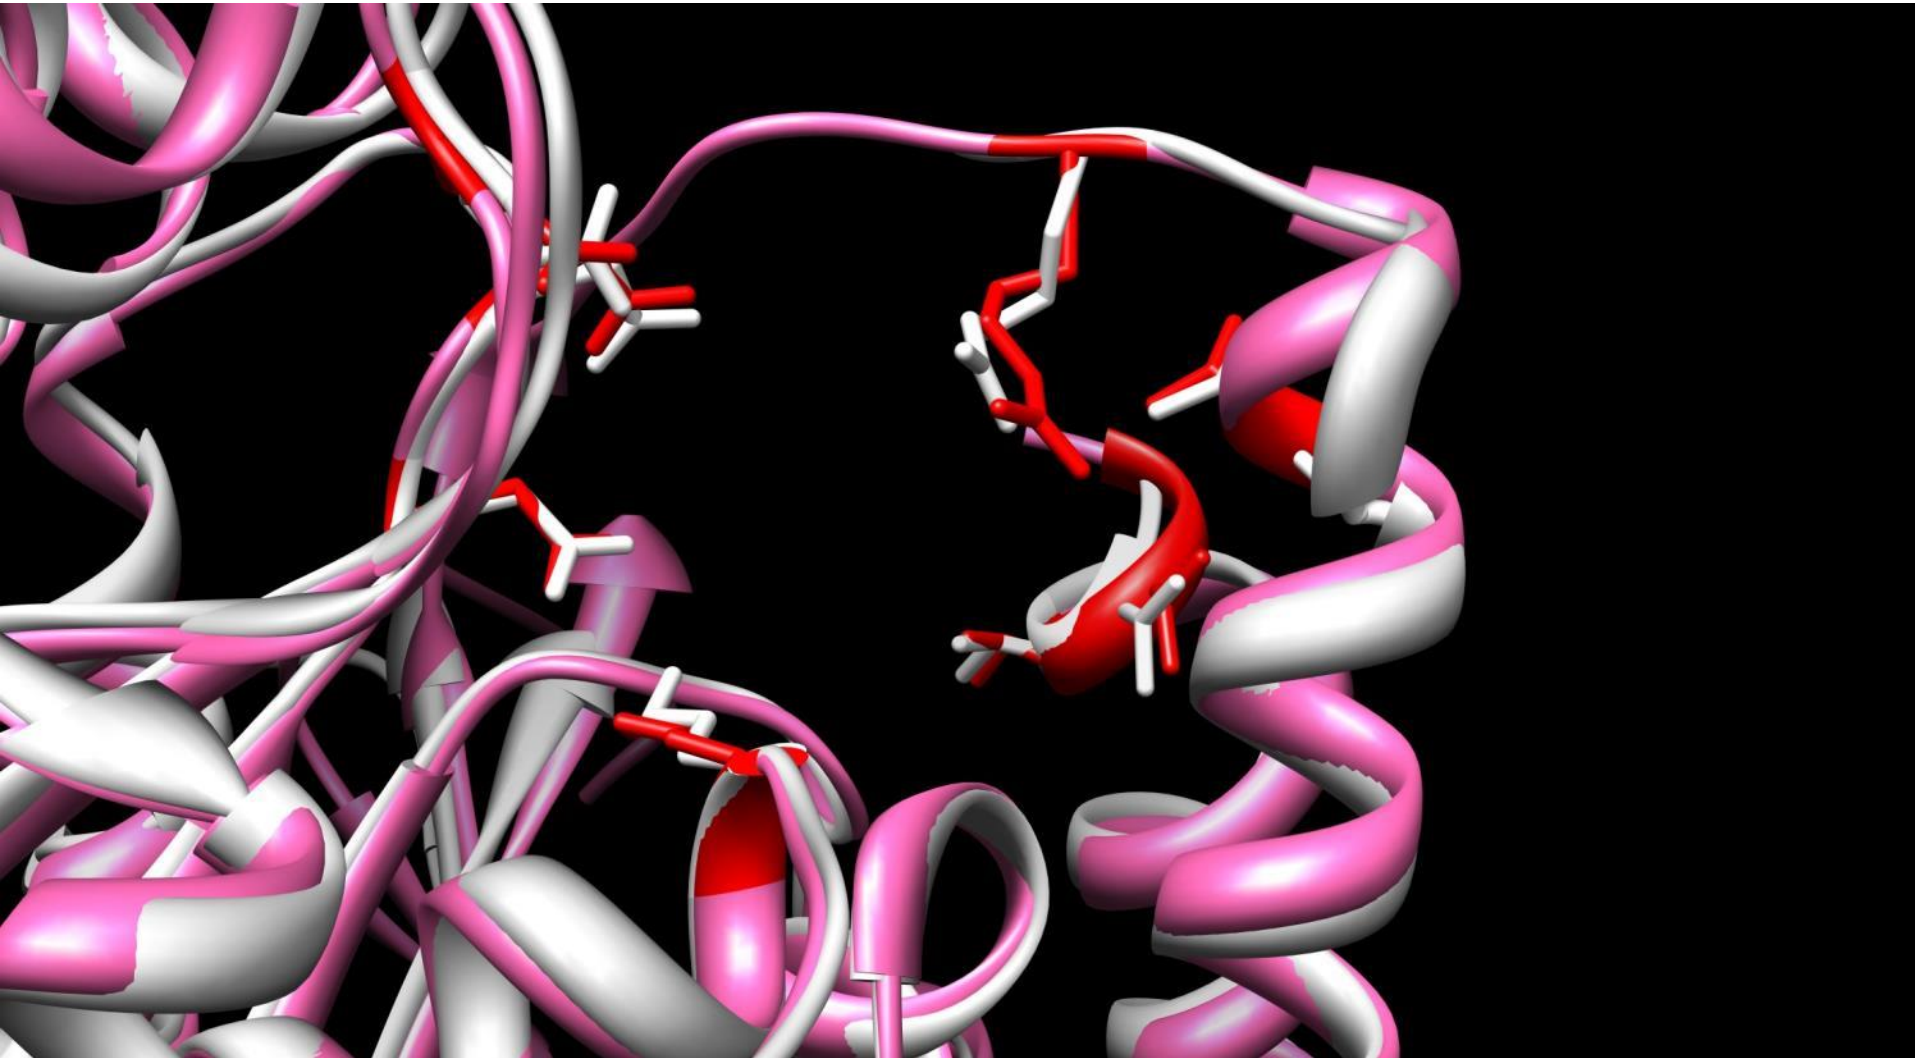

24. Mtb ddn (PDB:3R5L, white), *M. smegmatis* MSMEG\_3356 (3H96, red/pink)  
Sequence identity 36%, PS<sub>APF</sub> 69%

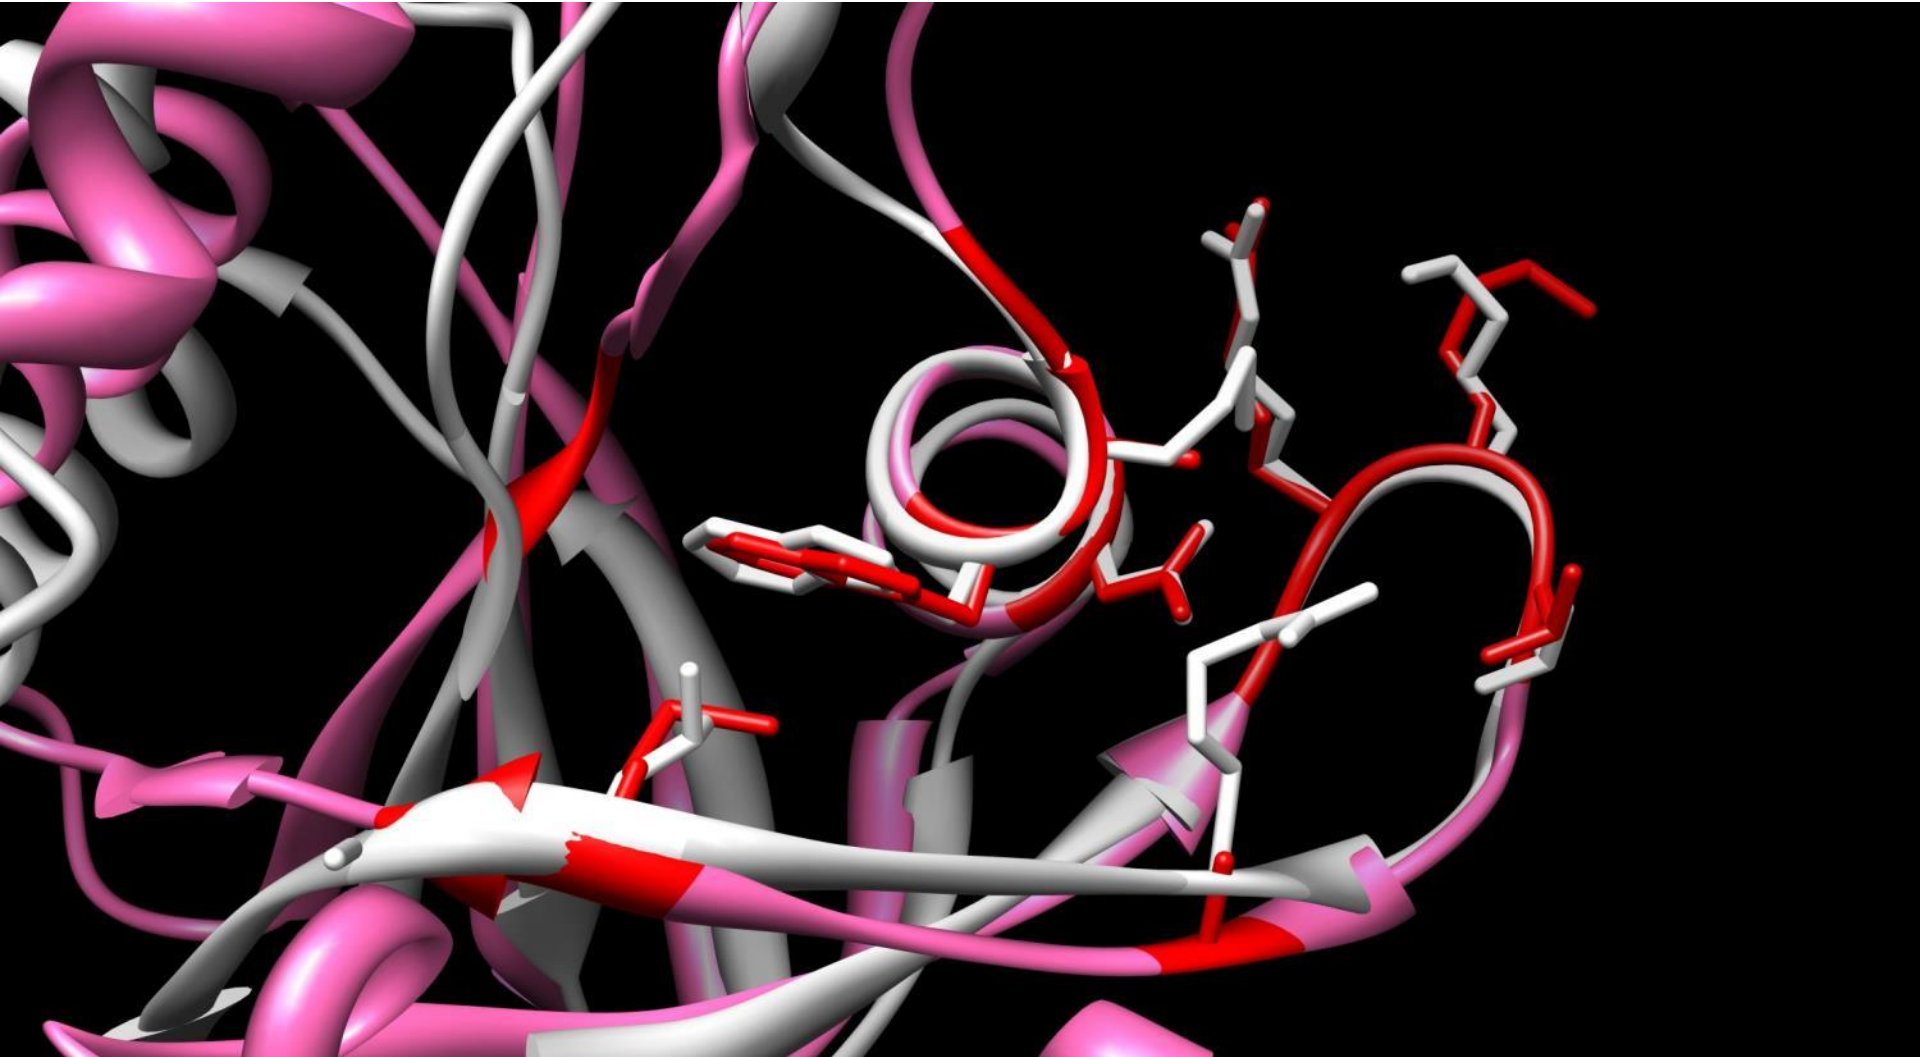

25. Mtb ald (PDB:2VHV, white), *M. smegmatis* pntAa (3P2Y, red/pink)  
Sequence identity 32%,  $PS_{APF}$  65%

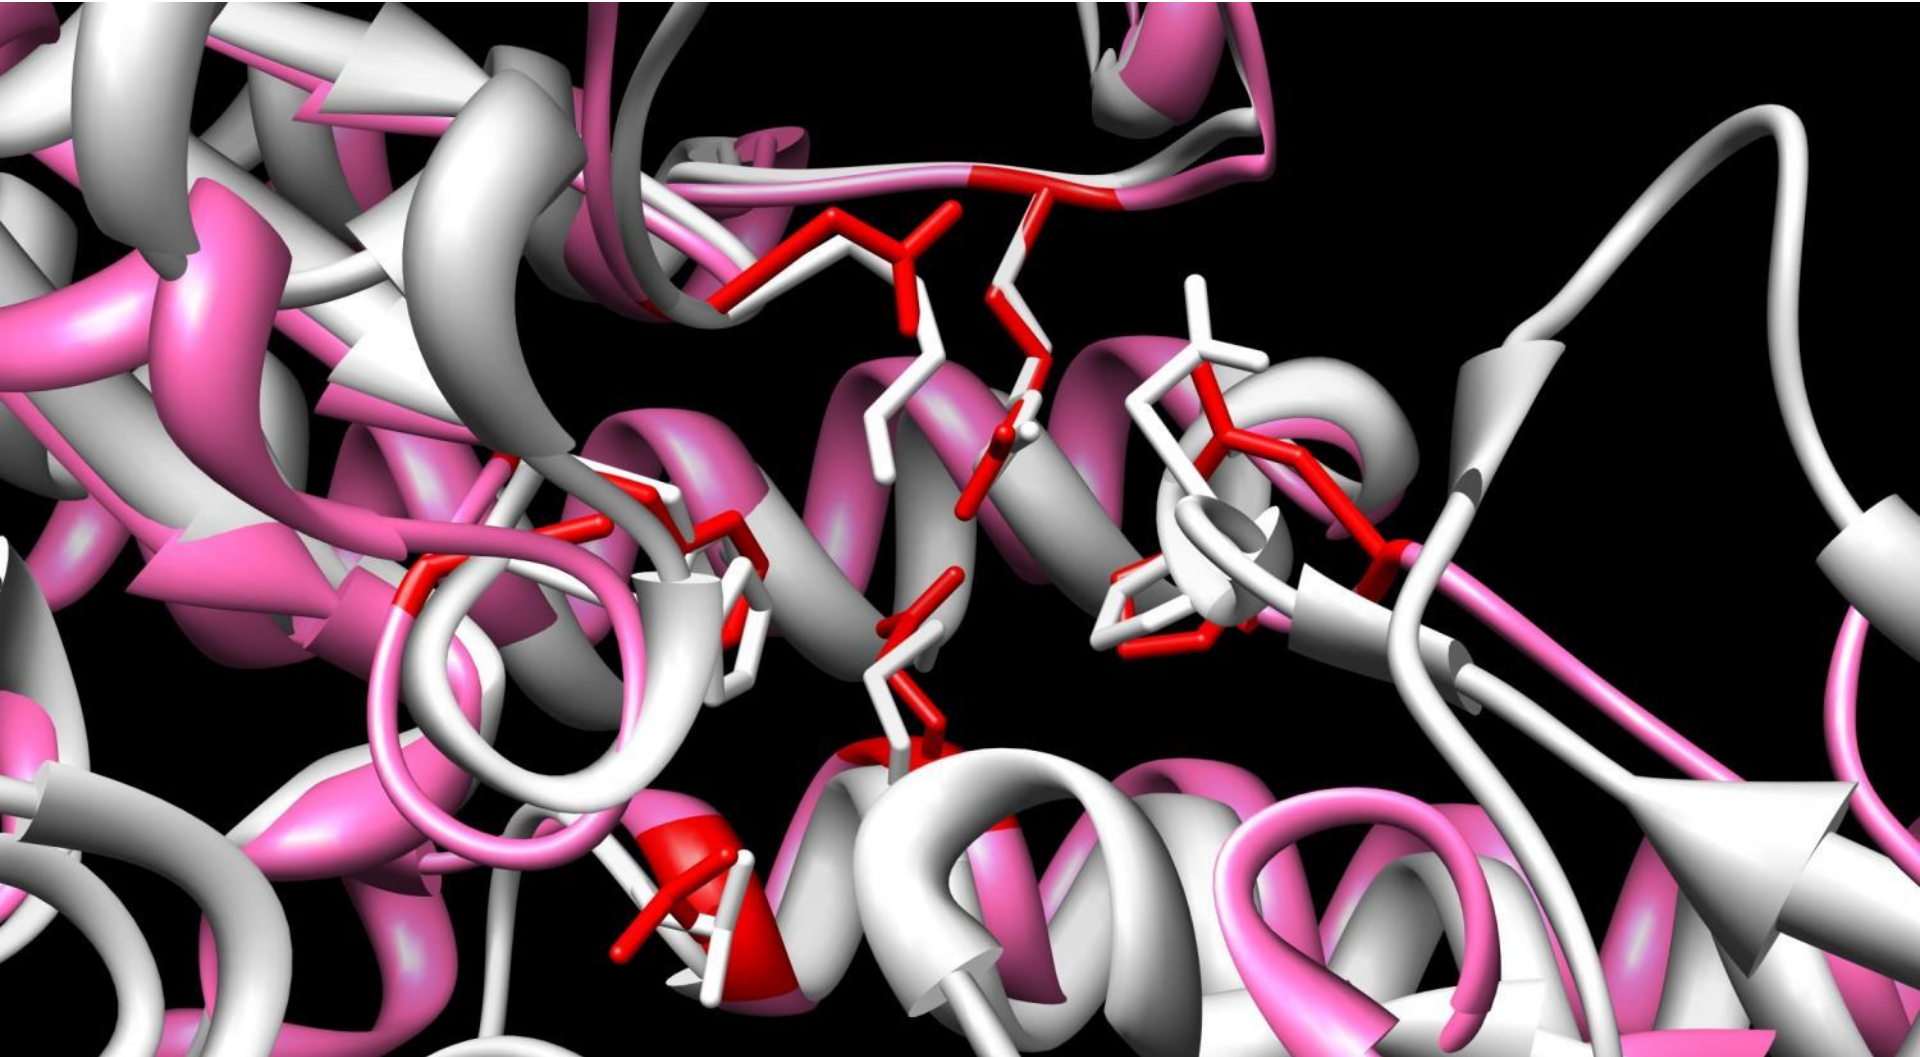



26. Mtb echA8 (PDB:3H81, white), *M. paratuberculosis* MAP\_2398 (3TLF, red/pink)  
Sequence identity 30%,  $PS_{APF}$  57%

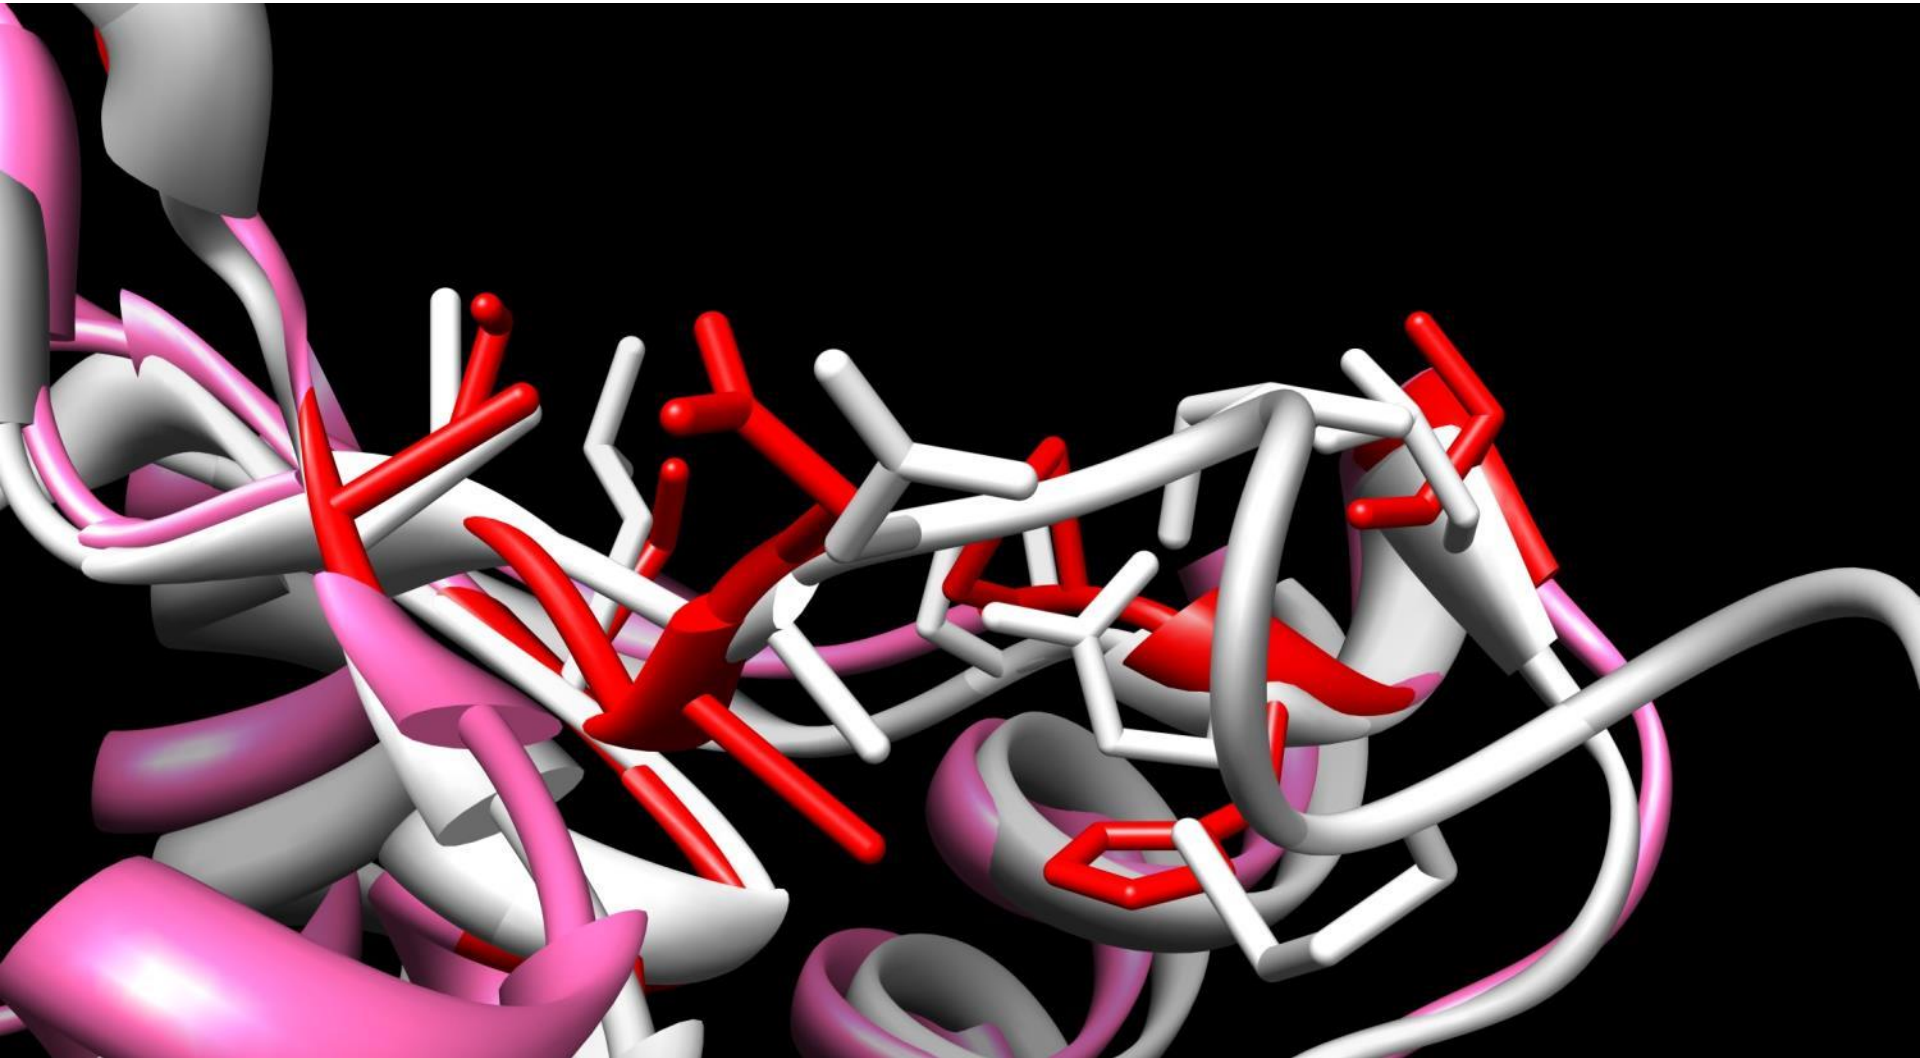

27. Mtb cyp130 (PDB:2UUQ, white), *M. smegmatis* cyp123 (3R9B, red/pink)  
Sequence identity 31%, PS<sub>APF</sub> 57%

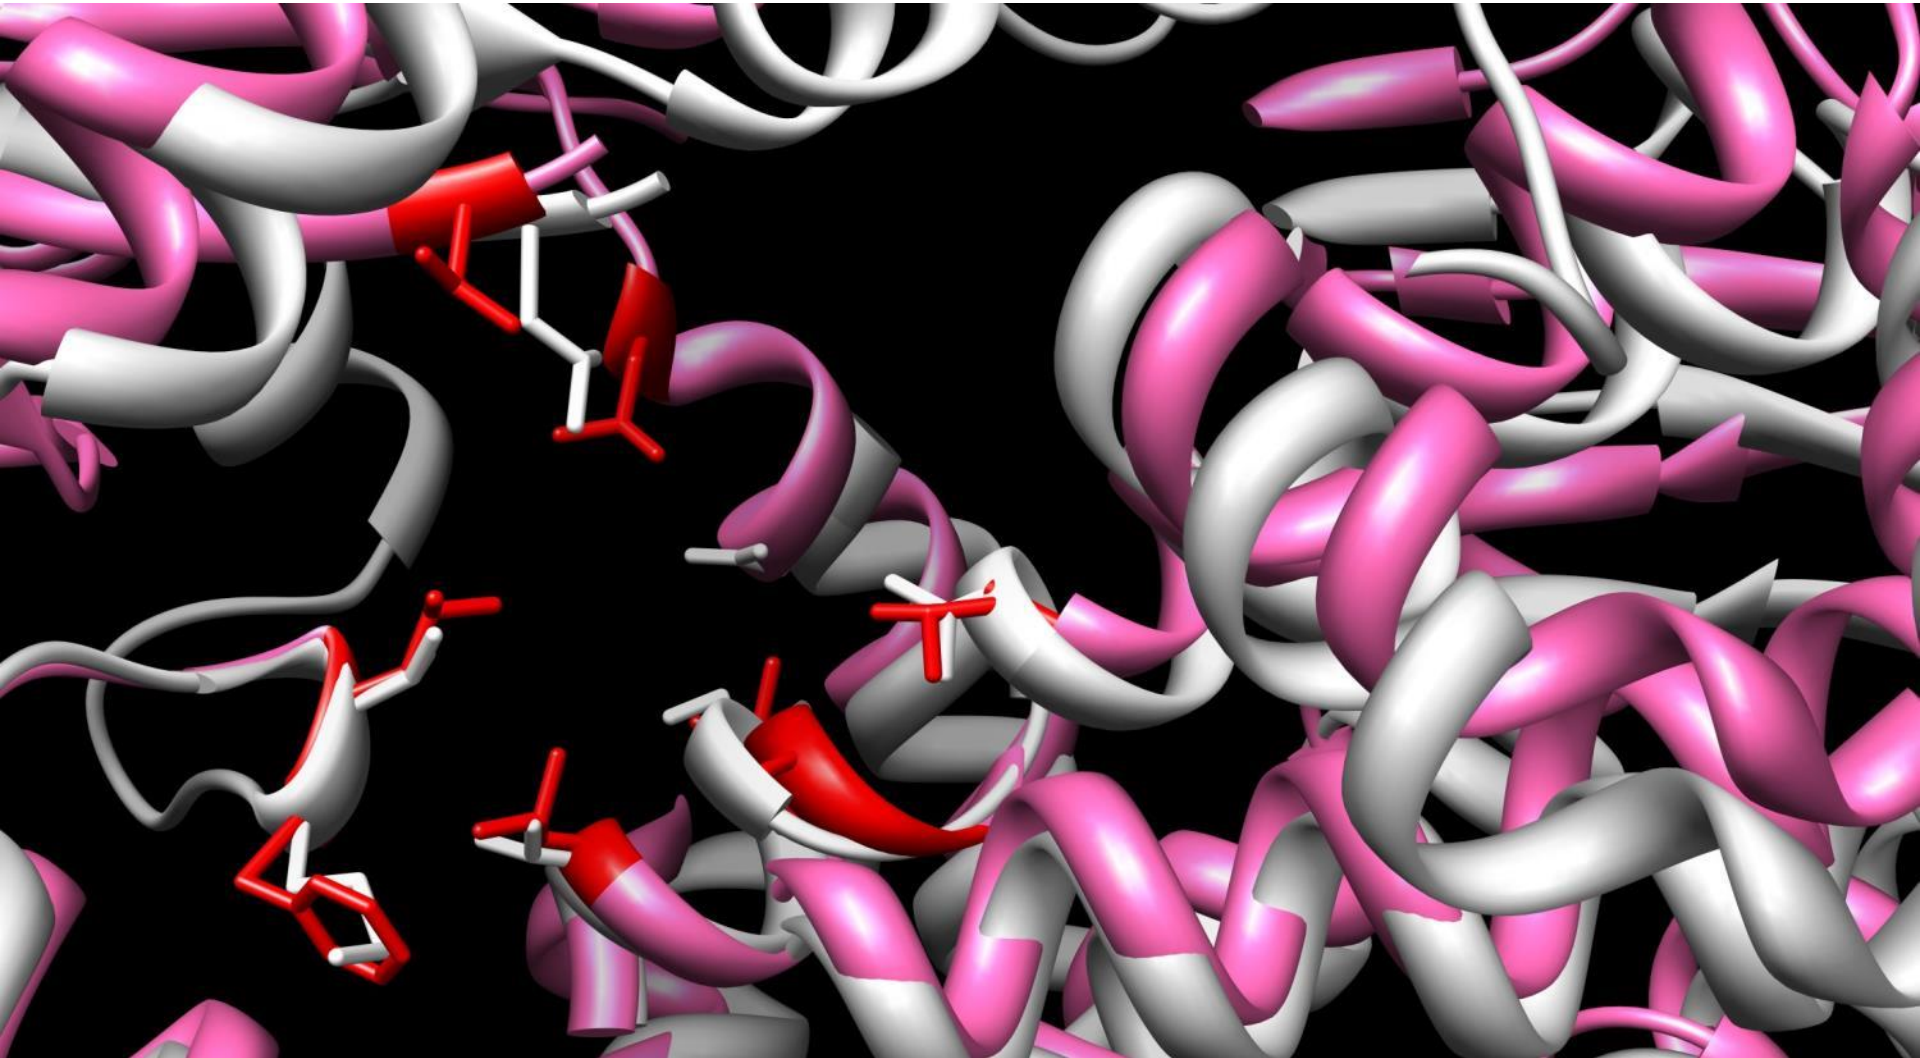



28. Mtb cyp142 (PDB:2XKR, white), *M. smegmatis* cyp123 (3R9B, red/pink)  
Sequence identity 35%, PS<sub>APF</sub> 56%

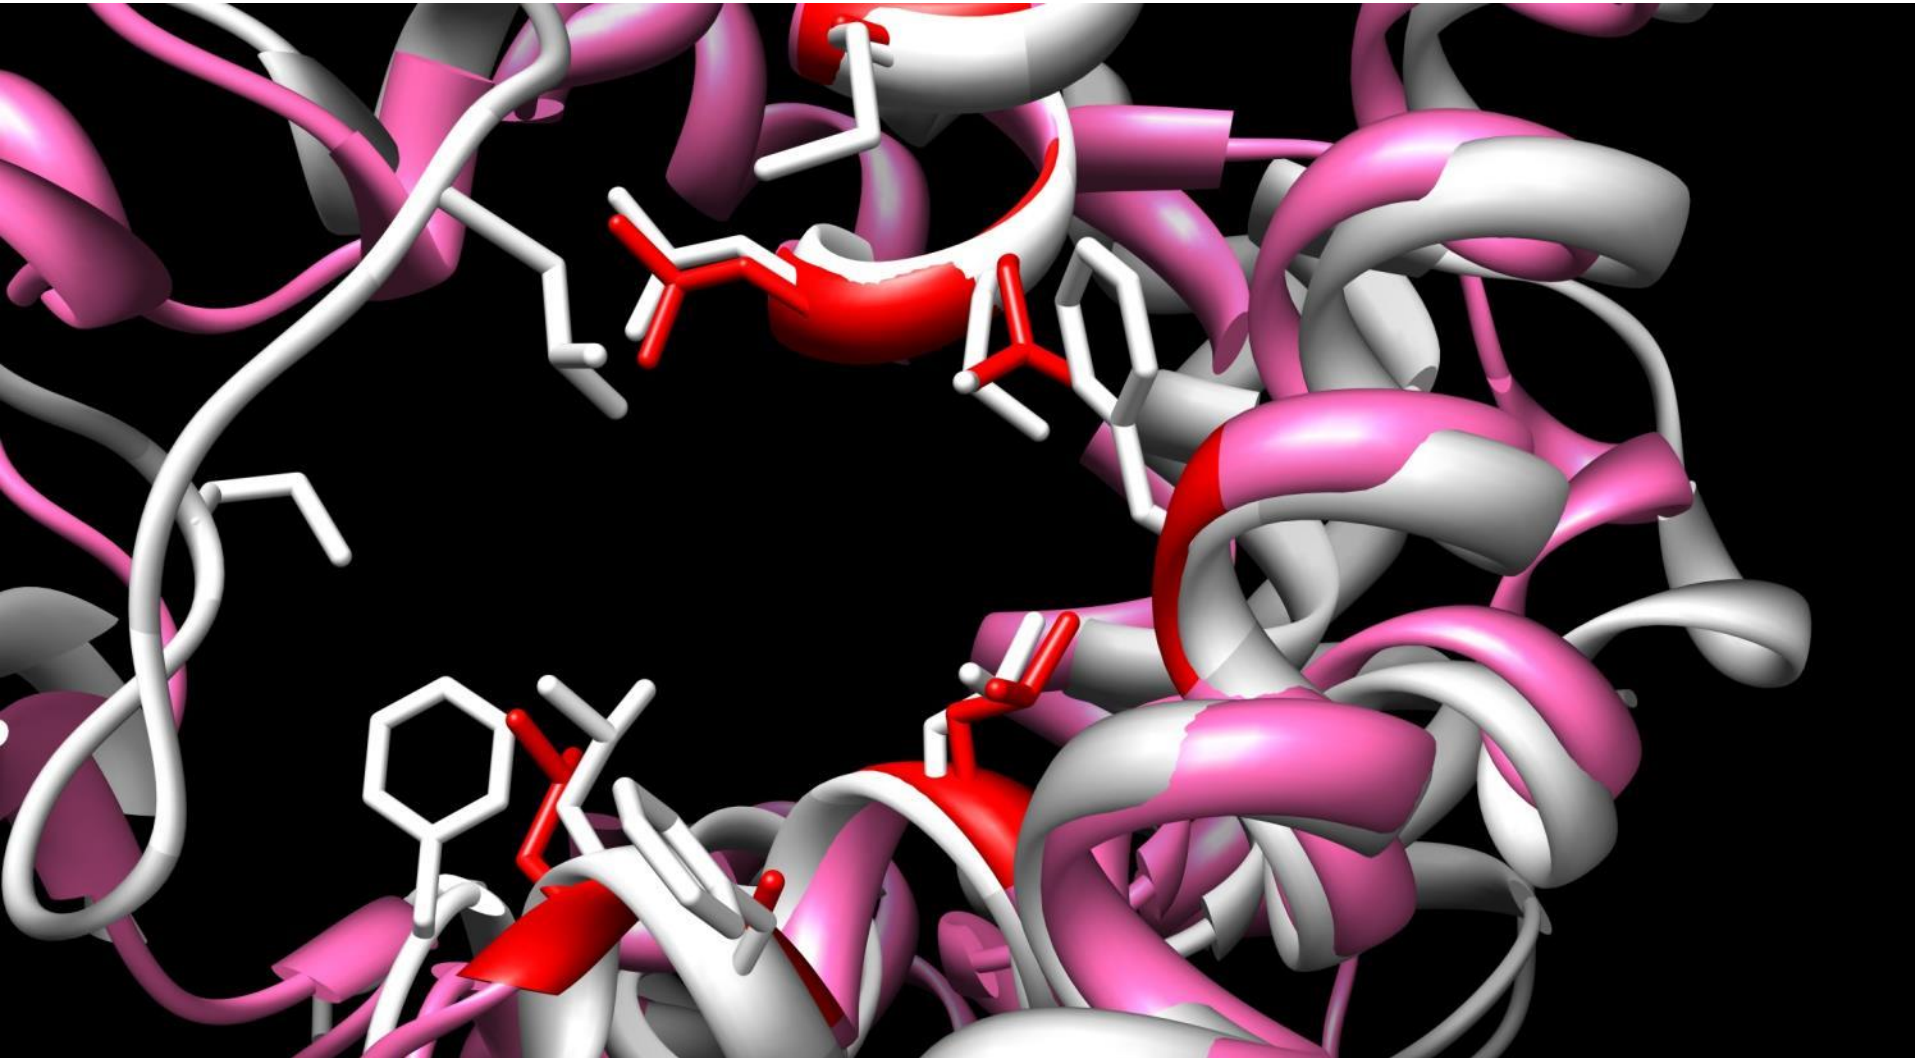



29. Mtb cysM (PDB:3DKI, white), *M. marinum* cysK1 (3RR2, red/pink)  
Sequence identity 38%,  $PS_{APF}$  55%

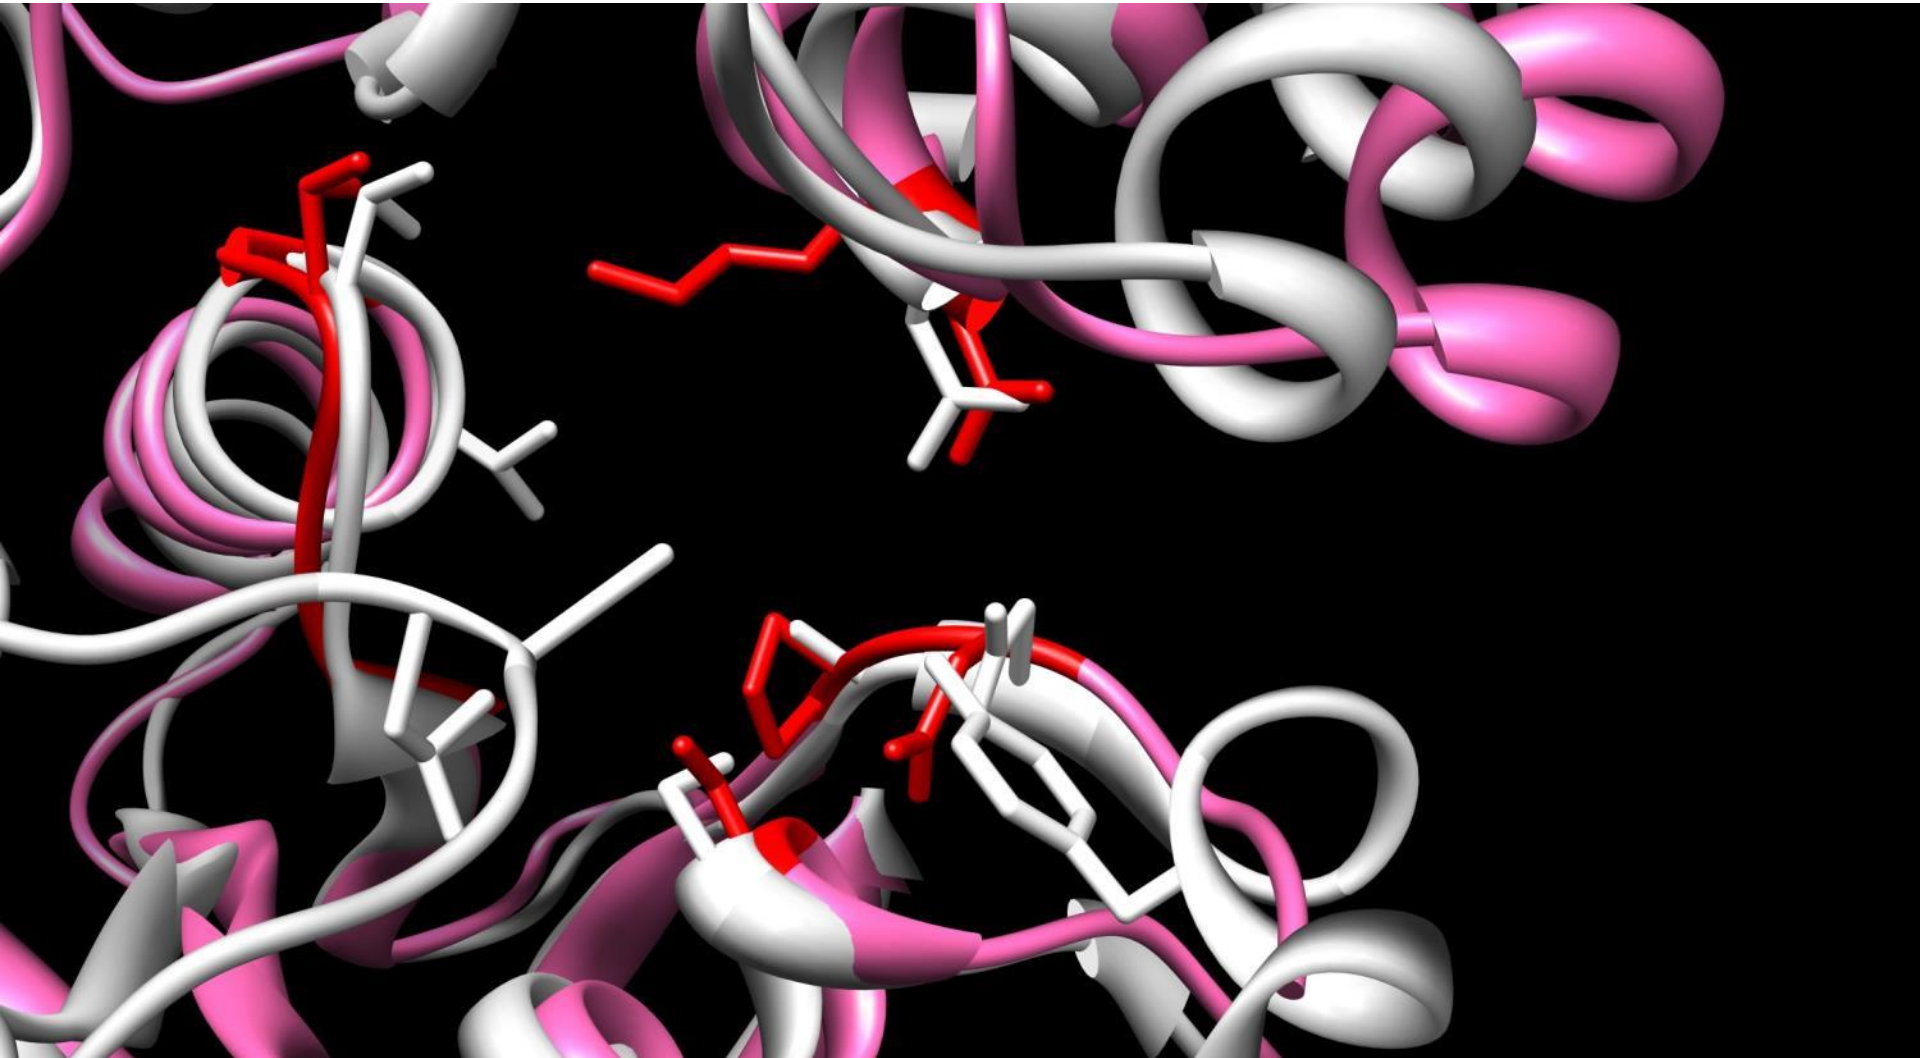

30. Mtb echA8 (PDB:3H81, white), *M. avium* MAV\_2597 (3R00, red/pink)  
Sequence identity 37%,  $PS_{APF}$  49%

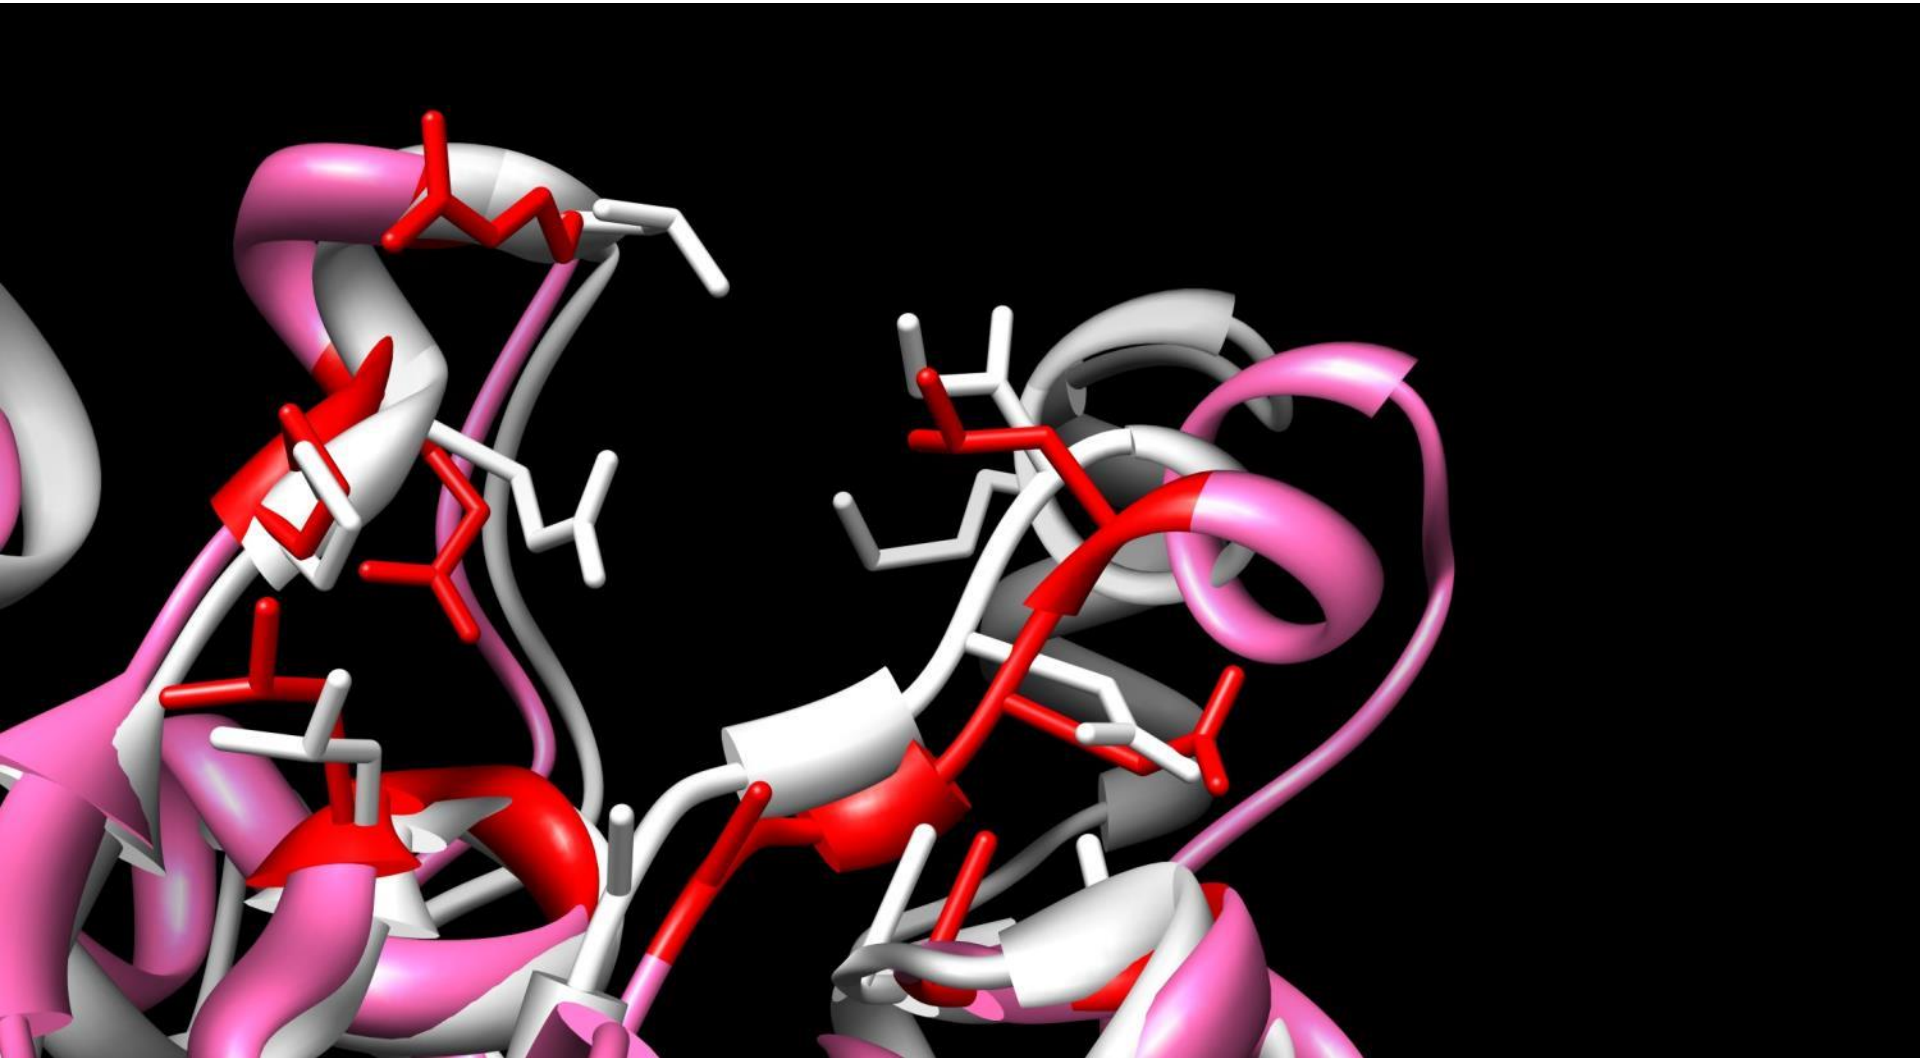

31. Mtb cyp124 (PDB:2WM5, white), *M. smegmatis* cyp123 (3R9B, red/pink)  
Sequence identity 32%,  $PS_{APF}$  42%

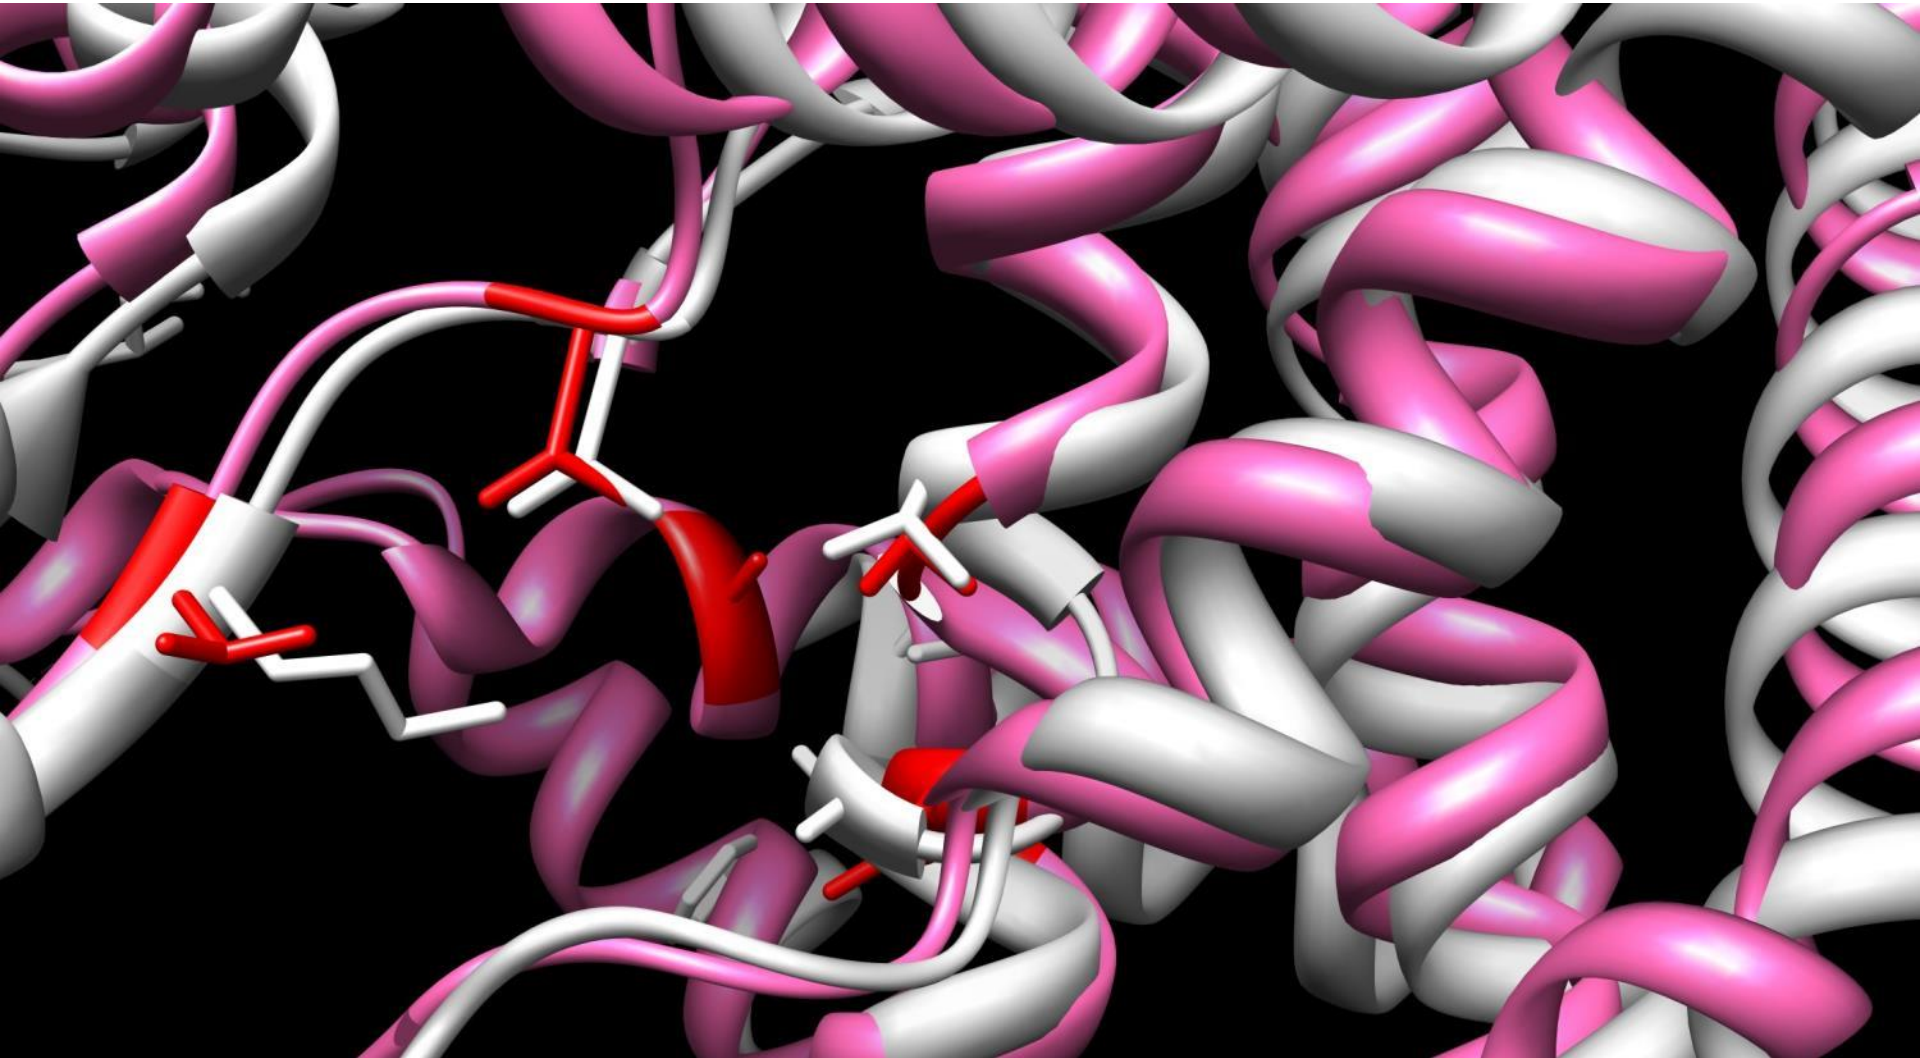



32. Mtb cysM (PDB:3DKI, white), *M. ulcerans* cysK1 (4I1Y, red/pink)  
Sequence identity 38%, PS<sub>APF</sub> 39%

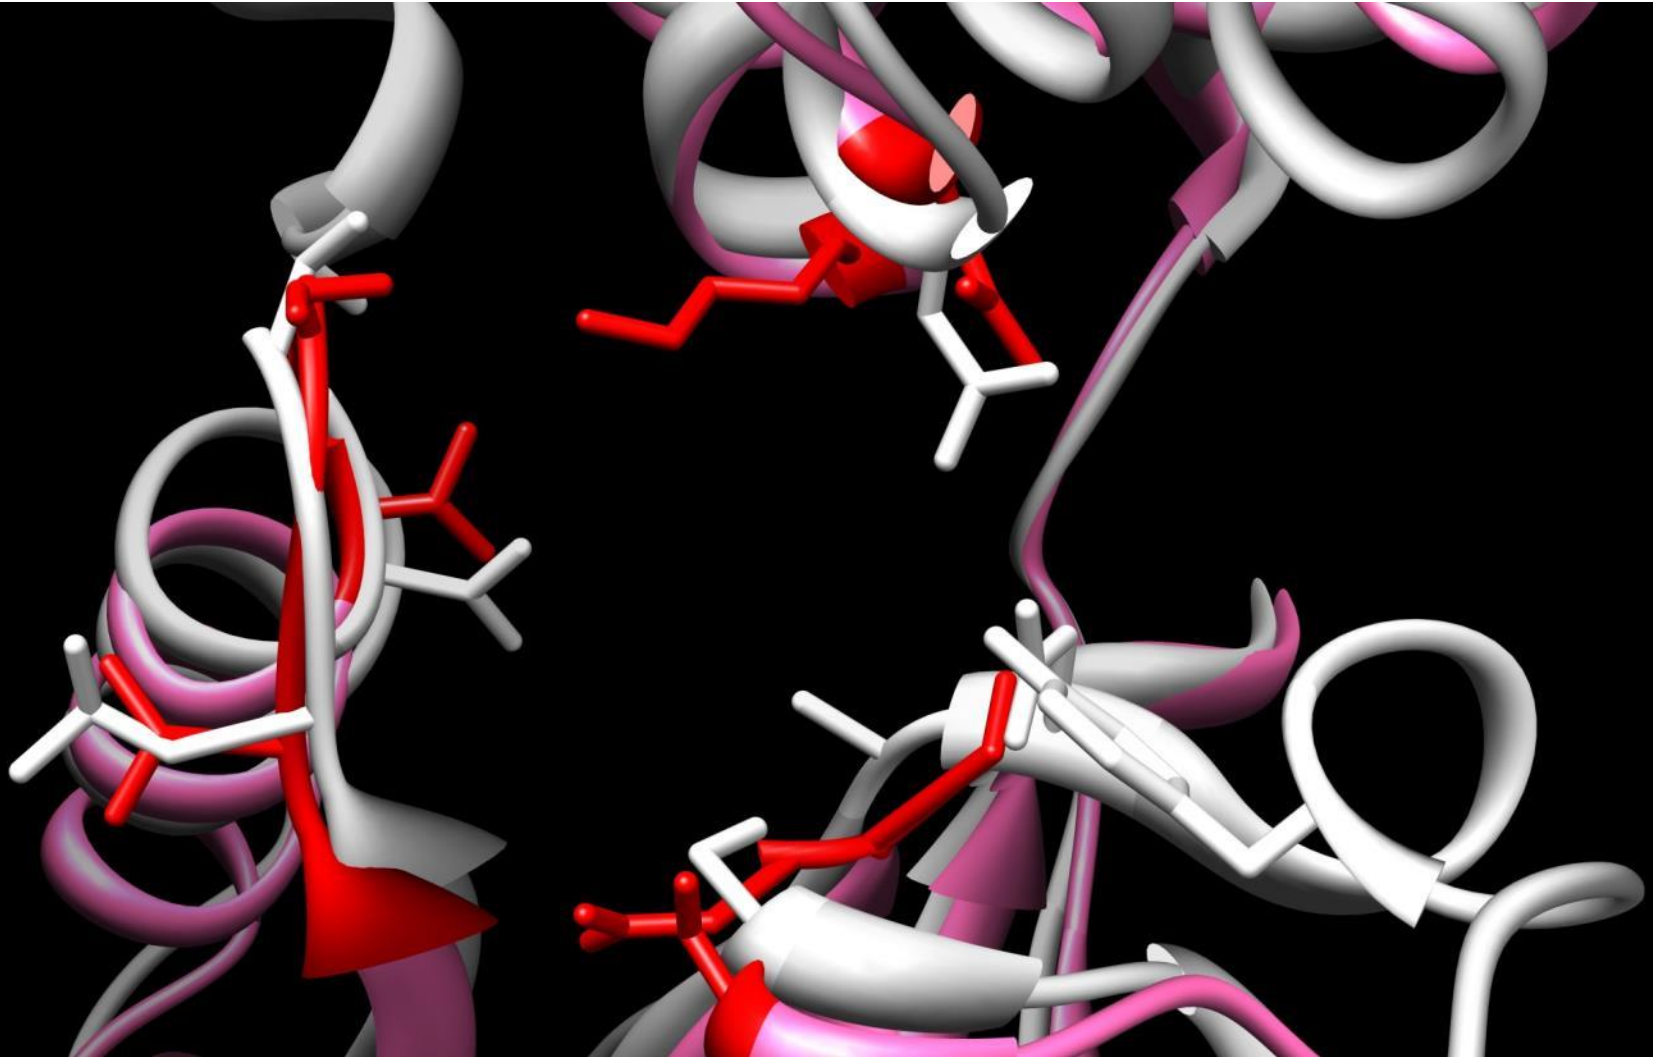

33. Mtb cyp125 (PDB:2X5L, white), *M. smegmatis* cyp123 (3R9B, red/pink)  
Sequence identity 25%,  $PS_{APF}$  23%

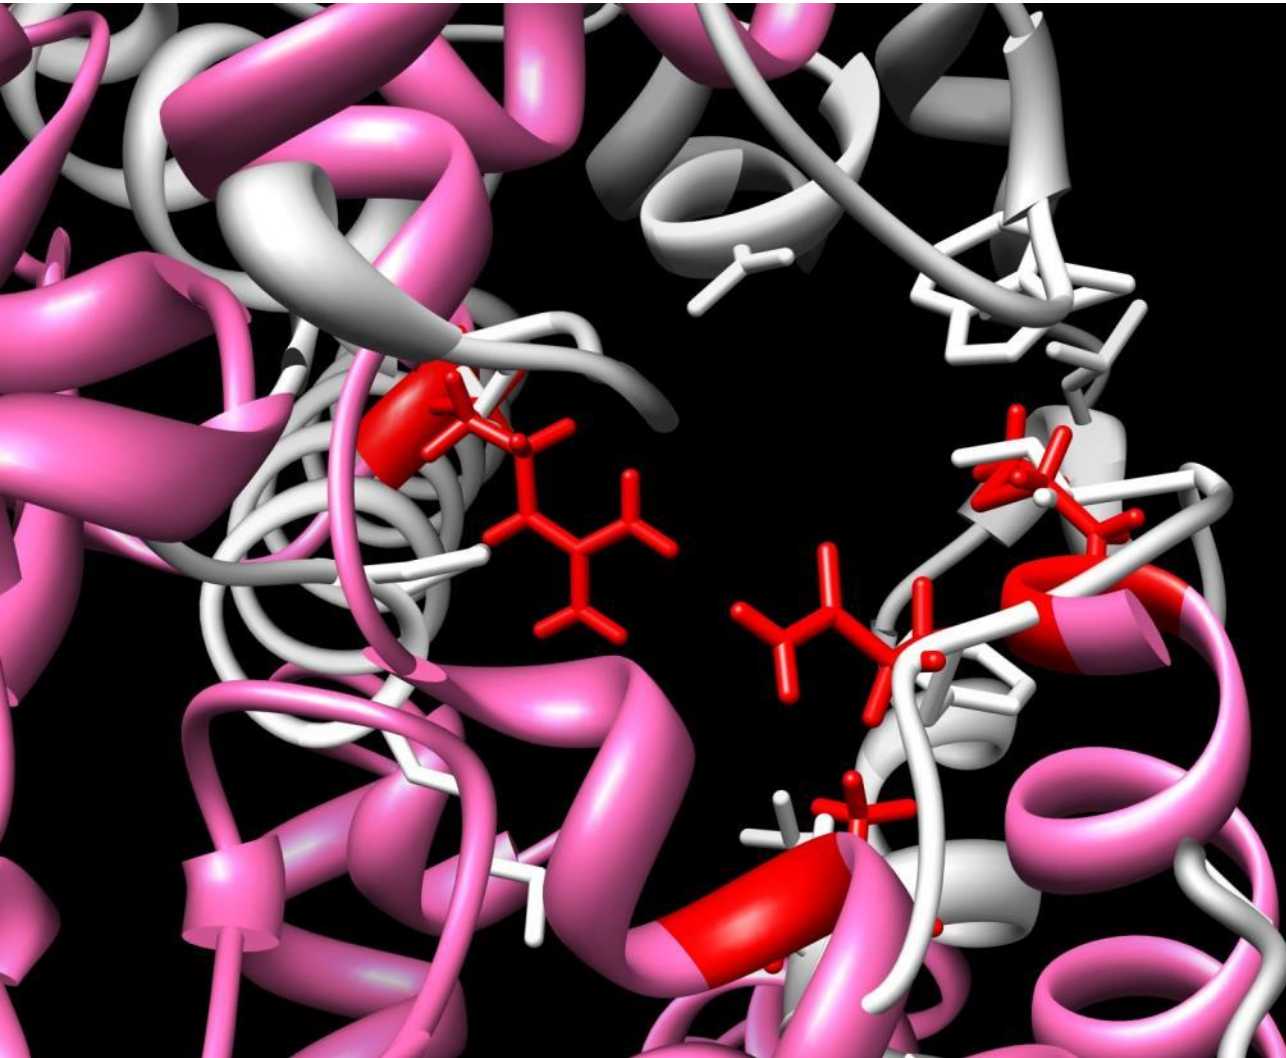

Supplement: NIHMS651176-supplement-1.pdf [file NIHMS651176-supplement-1.pdf]
