# Supplementary material
Source: PubMed Central journal article supplement (PMC4361283)

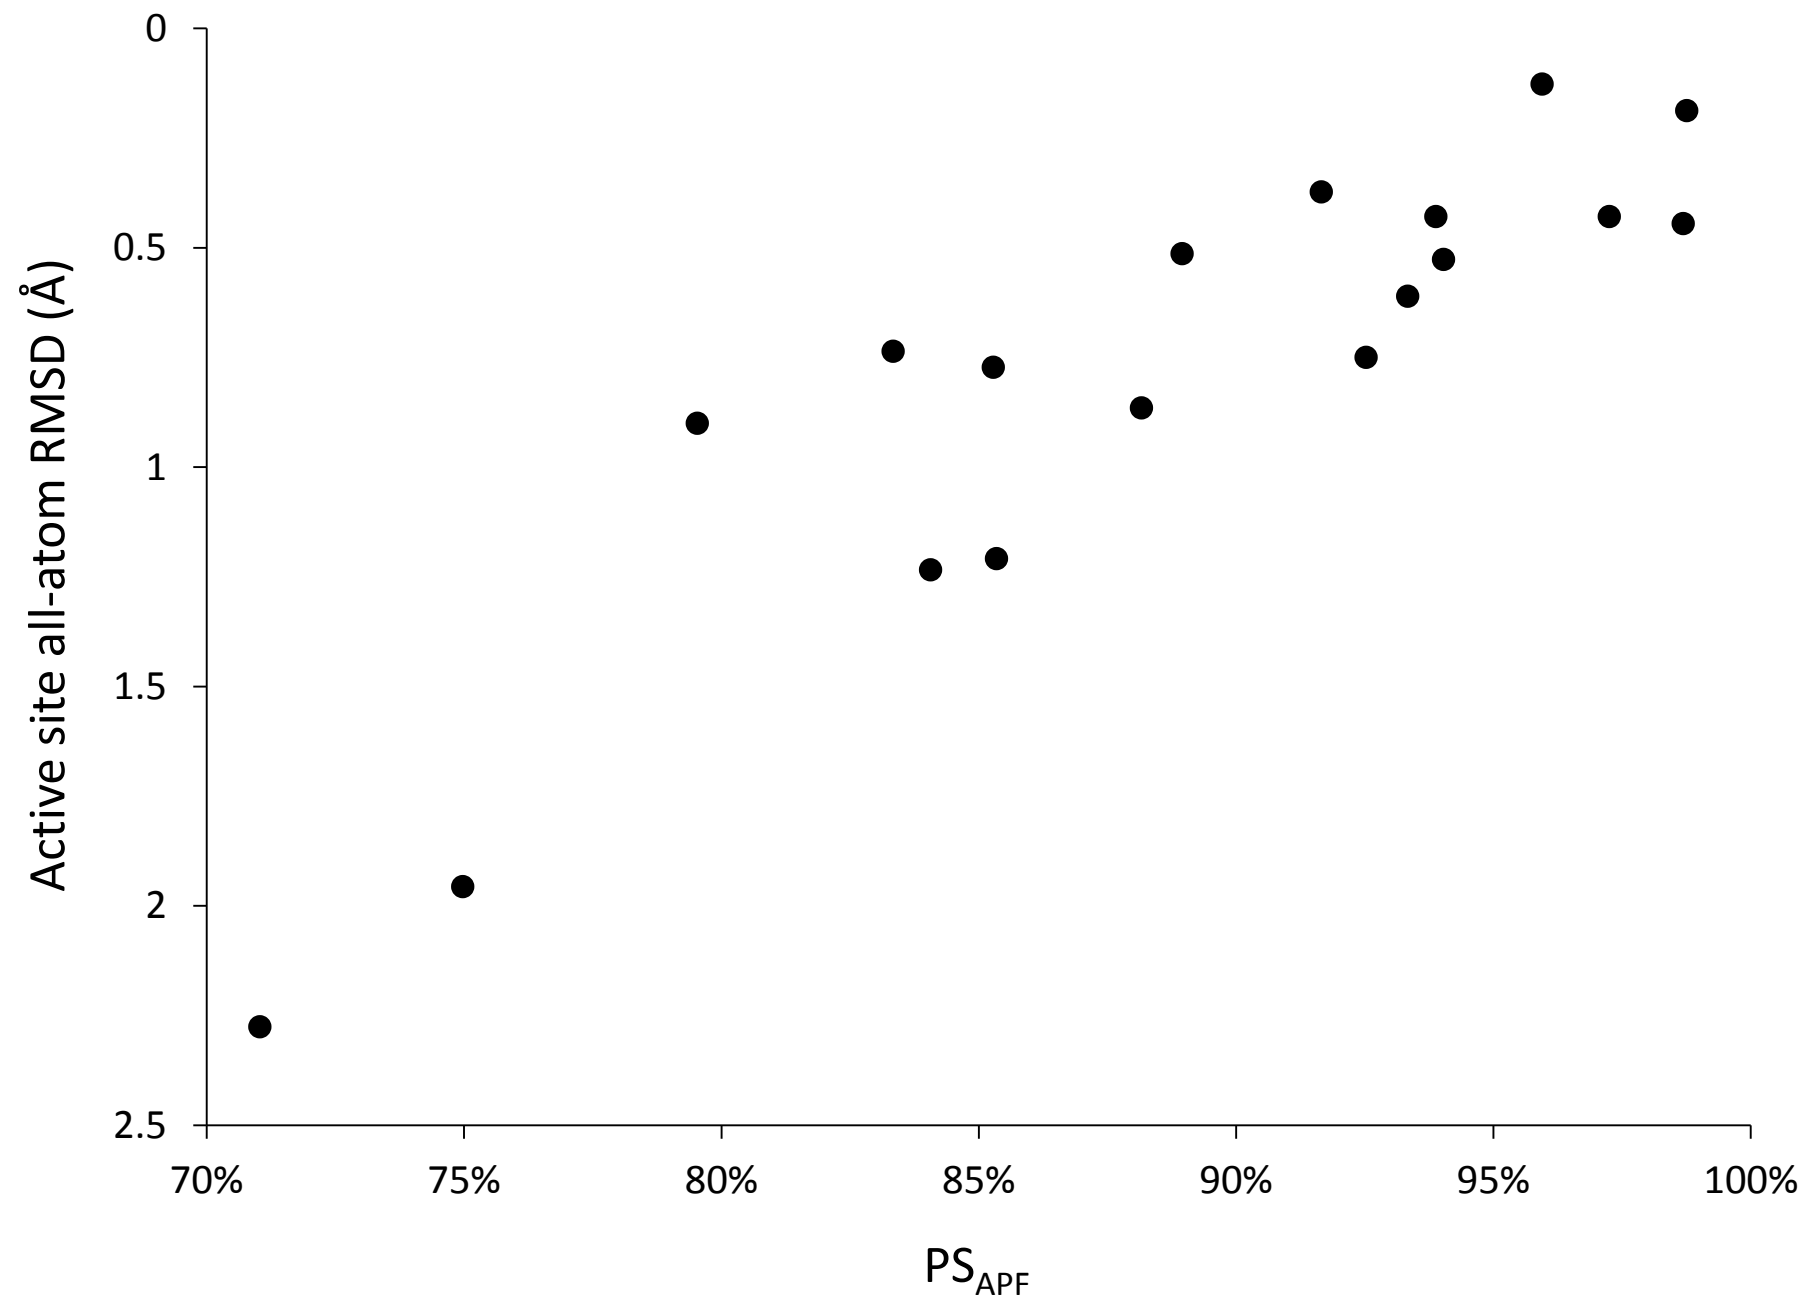

Supplement: NIHMS651176-supplement-2.pdf [file NIHMS651176-supplement-2.pdf]
